# Supplementary material for: Influence of allocation concealment and intention-to-treat analysis on treatment effects of physical therapy interventions in low back pain randomised controlled trials: a protocol of a meta-epidemiological study
Source: PubMed Central journal article supplement — BMJ Open. 2017 Sep 27;7(9):e017301. doi: 10.1136/bmjopen-2017-017301 (PMC5623523; doi:10.1136/bmjopen-2017-017301), 2017-09-27
Supplement: bmjopen-2017-017301.draft_revisions.pdf [file bmjopen-2017-017301.draft_revisions.pdf]

# BMJ Open

BMJ Open is committed to open peer review. As part of this commitment we make the peer review history of every article we publish publicly available.

When an article is published we post the peer reviewers' comments and the authors' responses online. We also post the versions of the paper that were used during peer review. These are the versions that the peer review comments apply to.

The versions of the paper that follow are the versions that were submitted during the peer review process. They are not the versions of record or the final published versions. They should not be cited or distributed as the published version of this manuscript.

BMJ Open is an open access journal and the full, final, typeset and author-corrected version of record of the manuscript is available on our site with no access controls, subscription charges or pay-per-view fees (<http://bmjopen.bmj.com>).

If you have any questions on BMJ Open's open peer review process please email [editorial.bmjopen@bmj.com](mailto:editorial.bmjopen@bmj.com)

# BMJ Open

## THE INFLUENCE OF ALLOCATION CONCEALMENT AND INTENTION-TO-TREAT ANALYSIS ON TREATMENT EFFECTS OF PHYSICAL THERAPY INTERVENTIONS IN LOW BACK PAIN RANDOMIZED CONTROLLED TRIALS: A PROTOCOL OF A META-EPIDEMIOLOGICAL STUDY

|                                 |                                                                                                                                                                                                                                                                                                                                                                                                         |
|---------------------------------|---------------------------------------------------------------------------------------------------------------------------------------------------------------------------------------------------------------------------------------------------------------------------------------------------------------------------------------------------------------------------------------------------------|
| Journal:                        | <i>BMJ Open</i>                                                                                                                                                                                                                                                                                                                                                                                         |
| Manuscript ID                   | bmjopen-2017-017301                                                                                                                                                                                                                                                                                                                                                                                     |
| Article Type:                   | Protocol                                                                                                                                                                                                                                                                                                                                                                                                |
| Date Submitted by the Author:   | 13-Apr-2017                                                                                                                                                                                                                                                                                                                                                                                             |
| Complete List of Authors:       | Almeida, Matheus; Universidade Cidade de Sao Paulo, Masters and Doctoral Programs in Physical Therapy;<br>Saragiotto, Bruno; The University of Sydney, School of Public Health, Sydney Medical School<br>Maher, Chris; The University of Sydney, School of Public Health, Sydney Medical School<br>Costa, Leonardo; Universidade Cidade de Sao Paulo, Masters and Doctoral Programs in Physical Therapy |
| <b>Primary Subject Heading</b>: | Epidemiology                                                                                                                                                                                                                                                                                                                                                                                            |
| Secondary Subject Heading:      | Research methods, Evidence based practice, Rehabilitation medicine                                                                                                                                                                                                                                                                                                                                      |
| Keywords:                       | Epidemiologic Research Design, Low Back Pain, Physical Therapy Modalities                                                                                                                                                                                                                                                                                                                               |
|                                 |                                                                                                                                                                                                                                                                                                                                                                                                         |

SCHOLARONE™  
Manuscripts

1  
2  
3 1 THE INFLUENCE OF ALLOCATION CONCEALMENT AND INTENTION-  
4  
5 2 TO-TREAT ANALYSIS ON TREATMENT EFFECTS OF PHYSICAL  
6  
7 3 THERAPY INTERVENTIONS IN LOW BACK PAIN RANDOMIZED  
8  
9 4 CONTROLLED TRIALS: A PROTOCOL OF A META-EPIDEMIOLOGICAL  
10  
11 5 STUDY

14 6 Matheus Oliveira de Almeida<sup>1</sup>, Bruno Tirotti Saragiotto<sup>2</sup>, Chris Maher<sup>2</sup> and

16 7 Leonardo Oliveira Pena Costa<sup>1</sup>

18 8 <sup>1</sup>Masters and Doctoral Programs in Physical Therapy, Universidade Cidade de São  
19  
20 9 Paulo

22 10 <sup>2</sup>School of Public Health, Sydney Medical School, The University of Sydney

27 12 **\*Author for correspondence:** Matheus Oliveira de Almeida

29 13 Universidade Cidade de São Paulo. Rua Cesário Galeno, 448/475, Tatuapé, São Paulo,  
30  
31 14 SP, Brazil, 05508-900. E-mail: [mathewsalmeyda@hotmail.com](mailto:mathewsalmeyda@hotmail.com)

36 16 **FUNDING STATEMENT**

38 17 Matheus Almeida is supported by São Paulo Research Foundation (FAPESP) -  
39  
40 18 grant #2016/10317-0.

43 19 **AUTHORS' CONTRIBUTIONS**

45 20 MOA, BTS and LOPC conceived and designed the study. CM contributed to the  
46  
47 21 development of the protocol. All of the authors assisted in the final protocol and agreed  
48  
49 22 to its final approval before submission.

52 23 **COMPETING INTEREST**

54 24 None

1  
2  
3 26 **ABSTRACT**

4 27 **Introduction:** The presence of methodological bias, such as inadequate allocation  
5  
6 28 concealment and lack of intention-to-treat analysis may overestimate the treatment  
7  
8 29 effects from randomized controlled trials. Meta-epidemiological studies have been  
9  
10 30 performed in a large number of health-care areas. However, there are no studies  
11  
12 31 investigating these issues in physical therapy interventions for patients with low back  
13  
14 32 pain. The aim of this study is to investigate the influence of allocation concealment and  
15  
16 33 the use of intention-to-treat analysis on estimates of the treatment effects of physical  
17  
18 34 therapy interventions in low back pain clinical trials from meta-analyses.

19  
20 35 **Methods and analysis:** A search on PubMed, Embase, Cochrane Database of  
21  
22 36 Systematic Reviews and PEDro databases will be performed. We will include all meta-  
23  
24 37 analyses of randomized controlled trials that compared physical therapy interventions in  
25  
26 38 patients with low back pain compared with placebo or no intervention, and have pain  
27  
28 39 intensity or disability as the primary outcomes. Information about selection (allocation  
29  
30 40 concealment) and attrition bias (intention-to-treat analysis) will be extracted from the  
31  
32 41 PEDro Database. Information about bibliographic data, study characteristics,  
33  
34 42 participants' characteristics and study results will be extracted from each systematic  
35  
36 43 review. A random effect model of meta-analyses will be used to pool the effect sizes.  
37  
38 44 Finally, a meta-regression will be performed to assess the association between  
39  
40 45 methodological features (allocation concealment and intention to treat analysis) and  
41  
42 46 effect sizes. The dependent variable will be the effect size (the mean between-group  
43  
44 47 differences) for the primary outcomes (pain or disability), while the independent  
45  
46 48 variables will be the methodological features of interest (allocation concealment and  
47  
48 49 intention-to-treat analysis).

1  
2  
3 50 **Ethics and dissemination:** No ethical approval required for this study. The study  
4  
5 51 findings will be published in a peer-reviewed journal and presented at  
6  
7 52 national/international conferences.

8  
9  
10 53 **Registration number:** PROSPERO (CRD42016052347).

11  
12 54 **Keywords:** Epidemiologic Research Design; Low Back Pain; Physical Therapy  
13  
14 55 Modalities

15  
16  
17  
18 58 **Strengths and limitations of this study**

- 19  
20  
21 59 • This protocol was performed following the Preferred Reporting Items for  
22  
23 60 Systematic review and Meta-Analyses Protocols (PRISMA - P) guidelines.
- 24  
25 61 • This study will be the first one to evaluate the association between  
26  
27 62 methodological characteristics and the treatment effects of physical therapy  
28  
29 63 interventions in low back pain trials.
- 30  
31 64 • The results from this meta-epidemiological study are likely to bring new insights  
32  
33 65 to the physical therapy scientific community by informing issues that need to be  
34  
35 66 considered in randomized trials.

## 76 INTRODUCTION

77 Systematic reviews and meta-analyses of randomized controlled trials are  
78 considered the ‘gold standard’ to evaluate the efficacy and effectiveness of healthcare  
79 interventions.<sup>1,2</sup> Despite systematic reviews and meta-analyses providing the best  
80 available evidence to support clinical decision-making and to promote changes in health  
81 policies, they are not free of bias.<sup>3,4</sup> The presence of potential biases in clinical trials,  
82 such as inadequate allocation concealment (selection bias) or lack of intention-to-treat  
83 analysis (attrition bias) may overestimate the effect size of the interventions<sup>5-8</sup>. These  
84 types of bias can directly influence the results from meta-analyses, leading to inaccurate  
85 conclusions, misleading clinicians and researchers.<sup>9</sup>

86 Meta-epidemiological studies usually aim to understand the impact of study  
87 characteristics (i.e., methodological quality, study design) in randomized clinical trials  
88 (RCTs), investigating the association between specific these study characteristics and  
89 the intervention effect estimates from collections of meta-analyses.<sup>10,11</sup> A collection of  
90 meta-analyses is necessary to estimate the effects of methodological characteristics,  
91 since individual meta-analyses may inaccurately estimate these effects.<sup>12</sup>

92 Some meta-epidemiological studies have been previously published. These  
93 studies evaluated the influence of methodological characteristics, such as allocation  
94 concealment and intention-to-treat (ITT) analysis on the treatment effects of clinical  
95 interventions in different healthcare areas.<sup>6,12-14</sup> Results from these studies demonstrated  
96 that trials with inadequate allocation concealment overestimated the treatment effects up  
97 to 18%.<sup>6,12</sup> Most of the meta-analyses conclusions are likely to change if only trials with  
98 adequate allocation concealment were included. It has been reported that 69% of meta-  
99 analysis were no longer statistically significant when trials with unclear or inadequate

1  
2  
3 100 allocation concealment were excluded.<sup>15</sup> In contrast, the influence of performing ITT  
4  
5 101 analysis (or attrition bias) on the effect estimates of RCTs is still unclear.<sup>12,14,16</sup>  
6  
7

8 102 Most meta-epidemiological studies derived from reports of RCTs are from the  
9  
10 103 field of medicine. These studies are likely to be different from physical therapy trials,  
11  
12 104 especially regarding the type of intervention and outcomes assessed.<sup>17</sup> To date, there is  
13  
14 105 only one meta-epidemiological study published that evaluated the relationship between  
15  
16 106 methodological characteristics and the treatment effects of physical therapy  
17  
18 107 interventions.<sup>17</sup> This study included different areas of physical therapy and therefore,  
19  
20 108 selecting a wide range of different clinical conditions, leading to a large level of  
21  
22 109 heterogeneity that may hamper the association between the characteristics assessed and  
23  
24 110 treatment effects. Thus, we choose to focus on low back pain trials. Besides being the  
25  
26 111 most prevalent, costly and disabling musculoskeletal condition, low back pain is the  
27  
28 112 musculoskeletal condition with largest number of clinical trials in the literature.<sup>18-20</sup>  
29  
30

31  
32 113 The lack of meta-epidemiological studies in the literature that have evaluated the  
33  
34 114 association between methodological characteristics and the treatment effects of  
35  
36 115 interventions in low back pain trials motivated us to conduct this study.  
37  
38

39 116

## 40 117 **OBJECTIVES**

41  
42 118 The objectives of this study are: (1) to establish if adequate allocation  
43  
44 119 concealment and the use of intention to treat analysis influence the effect size of  
45  
46 120 physical therapy interventions in meta-analyses of low back pain RCTs when compared  
47  
48 121 with meta-analyses of trials without these characteristics; (2) to evaluate if allocation  
49  
50 122 concealment process and intention to treat analyses are evaluated and reported  
51  
52 123 adequately in clinical trials.  
53  
54

55  
56 124  
57  
58  
59  
60

1  
2  
3 125 **METHODS**

4  
5 126 **Study design**

6  
7 127 Protocol of a meta-epidemiological study

8  
9 128 **Protocol and registration**

10  
11 129 The protocol was prospectively registered at the International Prospective  
12 Register of Systematic Reviews (PROSPERO), registration number: CRD42016052347.

13  
14 130 We followed the Preferred Reporting Items for Systematic review and Meta-Analyses  
15  
16 131 Protocols (PRISMA - P)<sup>21</sup> guidelines and the checklist is available (see appendix 1).

17  
18 132  
19  
20 133 **Identification and selection of studies**

21  
22 134 All meta-analyses of randomized controlled trials evaluating treatment of non-  
23  
24 135 specific low back pain will be included in this study. Non-specific low back pain is  
25  
26 136 defined as low back pain not attributed to a specific pathology, such as nerve root  
27  
28 137 compromise or serious spinal pathology.<sup>22</sup> We will include meta-analyses composed of  
29  
30 138 RCTs comparing physical therapy interventions in adult patients with non-specific low  
31  
32 139 back pain with placebo or no intervention, and have pain intensity measured by  
33  
34 140 continuous measures (such as the 11-point numerical rating scale) or disability (such as  
35  
36 141 the Rolland-Morris Disability Questionnaire or Oswestry Disability Index) as the main  
37  
38 142 outcomes. Any meta-analysis with mixed populations will be excluded. Overview of  
39  
40 143 reviews will also not be included in our study. In the case of Cochrane reviews, if there  
41  
42 144 are multiple versions of the same review (i.e., updates), we will include only the most  
43  
44 145 recent one.

45  
46 146 Identification of studies to be included will be done through an electronic search  
47  
48 147 without language restriction and publication date in the following databases: PubMed  
49  
50 148 (<https://www.ncbi.nlm.nih.gov/pubmed>), Embase via OvidSP, Cochrane Database of  
51  
52 149 Systematic Reviews (<http://www.cochranelibrary.com/>) and PEDro  
53  
54  
55  
56  
57  
58  
59  
60



1  
2  
3 150 (<http://pedro.org.au/>). The search strategy will combine validated filters related to meta-  
4  
5 151 analyses and systematic reviews with physical therapy interventions on low back pain  
6  
7 152 (See appendix 2 for more details). Two review authors will independently assess and  
8  
9 153 select potential studies to be included based on titles and abstracts. Any discordance  
10  
11 154 will be solved by consensus, and if necessary, a third evaluator will arbitrate the final  
12  
13 155 decision. Full-texts of selected articles will be collected and evaluated in the same  
14  
15 156 manner.

### 17 157 **Risk of bias assessment (selection and attrition bias)**

18  
19 158 We will extract the information about selection (allocation concealment) and  
20  
21 159 attrition bias (use of intention to treat analysis) from the Physiotherapy Evidence  
22  
23 160 Database (PEDro) for each RCT.<sup>23</sup> The definitions used by the PEDro database about  
24  
25 161 these domains are: *allocation concealment process is considered adequate, if the*  
26  
27 162 *responsible for assignment has no information about participants included in the trial*  
28  
29 163 *and has no influence on the assignment sequence or on the decision about eligibility of*  
30  
31 164 *the participant (such as, use of sequentially sealed opaque envelopes or “off-site”*  
32  
33 165 *allocation); ITT analysis means that all participants were analyzed in the groups to*  
34  
35 166 *which they were originally allocated.*<sup>23</sup> When the score of domain bias from an included  
36  
37 167 article is not available at PEDro database, two review authors will independently assess  
38  
39 168 it, following the same recommendations stated above. Any disagreements will be  
40  
41 169 resolved by discussion or arbitration by a third reviewer when consensus cannot be  
42  
43 170 reached.

### 44 171 **Data extraction and synthesis**

45  
46 172 Two review authors will independently extract data from selected systematic  
47  
48 173 reviews using a standardized extraction form. Any discordance will also be resolved by  
49  
50 174 discussion or arbitration by a third reviewer when consensus cannot be reached.  
51  
52  
53  
54  
55  
56  
57  
58  
59  
60

1  
2  
3 175 We will extract bibliographic data (authors, title and year of publication), study  
4  
5 176 characteristics (design, sample size and intervention used), characteristics of the  
6  
7 177 participants (gender, age, duration and severity of the condition), results of studies  
8  
9 178 included in the meta-analysis (mean and standard deviation). We will only extract  
10  
11 179 outcomes from the short-term follow-up (closest to 4 weeks). E-mail requests will be  
12  
13 180 sent to trial authors for additional information data, when necessary.

### 16 181 **Data analysis and synthesis**

17  
18 182 In order to determine whether allocation concealment and ITT analysis affect  
19  
20 183 treatment effect of interventions, a two-level analysis will be conducted. Initially, the  
21  
22 184 effect size of each study will be calculated by dividing the mean difference between  
23  
24 185 groups by the standard deviation values.<sup>24</sup> A negative effect size indicates a beneficial  
25  
26 186 effect of the experimental intervention. Individual study data will be retrieved from the  
27  
28 187 meta-analyses included in our study.

29  
30 188 After that, we will calculate two pooled effect size for each meta-analysis by  
31  
32 189 using a random effect model: one corresponding to the pooled effect size from studies  
33  
34 190 with the characteristics of interest (allocation concealment and ITT analysis) and the  
35  
36 191 other for studies without these characteristics. A negative difference in effect size  
37  
38 192 indicates a beneficial effect of studies without the characteristics of interest for the  
39  
40 193 experimental group. We will assess between-trial heterogeneity using I-squared test ( $I^2$ ).  
41  
42 194 This test demonstrates whether the percentage of total variation across studies is  
43  
44 195 explained by heterogeneity rather than chance. An  $I^2$  higher than 75% will be  
45  
46 196 considered as 'high heterogeneity', an  $I^2$  of 50% to 75% will be considered as 'moderate  
47  
48 197 heterogeneity', and an  $I^2$  lower than 25% will be considered as 'low heterogeneity'.<sup>25</sup>  
49  
50 198 Review Manager (RevMan) version 5 software will be used for all meta-analyses and  
51  
52 199 heterogeneity assessment.  
53  
54  
55  
56  
57  
58  
59  
60

1  
2  
3 200 The second-level analysis will be a meta-regression to evaluate the association  
4  
5 201 between characteristics of included studies and effect size. The dependent variable will  
6  
7 202 the effect size (mean between-group difference) for the main outcomes (pain or  
8  
9 203 disability), while the independent variables will be the methodological characteristics of  
10  
11 204 interest (allocation concealment and ITT analysis). Additionally, we will use three  
12  
13  
14 205 independent covariates in meta-regression analysis: sample size, sequence generation  
15  
16 206 and heterogeneity. The sample size will be classified as 'small' (< 100 patients  
17  
18 207 randomized per arm) or 'high' ( $\geq$  100 patients randomized per arm).<sup>26</sup> Sequence  
19  
20 208 generation is considered adequate when subjects were randomly allocated to groups  
21  
22 209 (e.g., computer-generated random numbers; coin-tossing and dice-rolling).<sup>23</sup> For the  
23  
24 210 heterogeneity assessment, we will adopt the classification described above. The  
25  
26 211 covariates will be used according to the number of studies included. For each 10 trials,  
27  
28 212 one covariate will be incorporated to the analysis. Random-effects meta-regression will  
29  
30 213 be conducted using the 'metareg' command in STATA 10 and weighted using effect  
31  
32 214 size standard errors.  
33  
34  
35  
36  
37

## 38 216 **DISCUSSION**

39  
40 217 To our knowledge, this is the first study aimed to investigate if meta-analyses'  
41  
42 218 findings and the magnitude of the effect sizes of physical therapy intervention in low  
43  
44 219 back pain RCTs could be influenced by methodological features (i.e., allocation  
45  
46 220 concealment and ITT analysis). Meta-analyses from RCTs are responsible for the most  
47  
48 221 reliable evidence on the treatment of patients with low-back pain, and its results are of  
49  
50 222 interest to a range of stakeholders. However, biased results from RCTs can lead to  
51  
52 223 inadequate clinical decision making and consequently affect patient outcomes.  
53  
54  
55  
56  
57  
58  
59  
60

1  
2  
3 224 Therefore, we believe that the findings of this meta-epidemiological study will  
4  
5 225 provide important contributions to clinicians, researchers, and policy-makers in the low-  
6  
7 226 back pain field. This study will improve the available evidence for physical therapists,  
8  
9 227 through the disclosure of reliable and unbiased results on clinical decision-making. It  
10  
11 228 will also help promoting better politics of evidence-based in this area by detecting  
12  
13 229 possible issues while interpreting trials of physical therapy interventions for patients  
14  
15 230 with back pain.

16  
17  
18 231 The present meta-epidemiological study has some strength points. Since this  
19  
20 232 approach is such similar to a systematic review, we will approach strictly methods to  
21  
22 233 identify and select studies to be included through defined inclusion criteria and sensitive  
23  
24 234 search strategy. Data extraction and analysis will be also performed by rigorous  
25  
26 235 methods to avoid potential bias in this study.

27  
28  
29 236 The limitation of the present study is the fact that it is restricted to meta-analyses  
30  
31 237 of physical therapy interventions in non-specific low back pain. Thus, our results may  
32  
33 238 have limited generalizability to other interventions as well as other clinical conditions.

### 34 239 **Dissemination**

35  
36  
37 240 We intend to disseminate our results through presentations at national and  
38  
39 241 international conferences (e.g., World Confederation for Physical Therapy and  
40  
41 242 International Back and Neck Pain Forum) as well as publishing our study in a high-  
42  
43 243 impact international scientific journal.

44  
45  
46  
47 244

### 48 245 **COMPETING INTEREST**

49  
50  
51 246 None

52  
53  
54 247

### 55 248 **REFERENCES**

- 1  
2  
3 249 1. Cook DJ, Mulrow CD, Haynes RB. Systematic reviews: synthesis of best evidence  
4  
5 250 for clinical decisions. *Ann Intern Med* 1997;126(5):376-80.
- 6  
7 251 2. Egger M, Smith GD. Meta-Analysis. Potentials and promise. *BMJ*  
8  
9 252 1997;315(7119):1371-4.
- 10  
11 253 3. Hemila H. Re: "Bias in clinical intervention research". *Am J Epidemiol*  
12  
13 254 2007;165(10):1219; author reply -20.
- 14  
15 255 4. Juni P, Altman DG, Egger M. Systematic reviews in health care: Assessing the  
16  
17 256 quality of controlled clinical trials. *BMJ* 2001;323(7303):42-6.
- 18  
19 257 5. Gluud LL. Bias in clinical intervention research. *Am J Epidemiol* 2006;163(6):493-  
20  
21 258 501.
- 22  
23 259 6. Schulz KF, Chalmers I, Hayes RJ, et al. Empirical evidence of bias. Dimensions of  
24  
25 260 methodological quality associated with estimates of treatment effects in controlled  
26  
27 261 trials. *JAMA* 1995;273(5):408-12.
- 28  
29 262 7. Moher D, Pham B, Jones A, et al. Does quality of reports of randomised trials affect  
30  
31 263 estimates of intervention efficacy reported in meta-analyses? *Lancet*  
32  
33 264 1998;352(9128):609-13.
- 34  
35 265 8. Kjaergard LL, Villumsen J, Gluud C. Reported methodologic quality and  
36  
37 266 discrepancies between large and small randomized trials in meta-analyses. *Ann Intern*  
38  
39 267 *Med* 2001;135(11):982-9.
- 40  
41 268 9. Turner L, Boutron I, Hrobjartsson A, et al. The evolution of assessing bias in  
42  
43 269 Cochrane systematic reviews of interventions: celebrating methodological contributions  
44  
45 270 of the Cochrane Collaboration. *Syst Rev* 2013;2:79.
- 46  
47 271 10. Naylor CD. Meta-analysis and the meta-epidemiology of clinical research. *BMJ*  
48  
49 272 1997;315(7109):617-9.
- 50  
51  
52  
53  
54  
55  
56  
57  
58  
59  
60

- 1  
2  
3 273 11. Sterne JA, Juni P, Schulz KF, et al. Statistical methods for assessing the influence of  
4  
5 274 study characteristics on treatment effects in 'meta-epidemiological' research. *Stat Med*  
6  
7 275 2002;21(11):1513-24.  
8  
9  
10 276 12. Wood L, Egger M, Gluud LL, et al. Empirical evidence of bias in treatment effect  
11  
12 277 estimates in controlled trials with different interventions and outcomes: meta-  
13  
14 278 epidemiological study. *BMJ* 2008;336(7644):601-5.  
15  
16 279 13. Nuesch E, Reichenbach S, Trelle S, et al. The importance of allocation concealment  
17  
18 280 and patient blinding in osteoarthritis trials: a meta-epidemiologic study. *Arthritis Rheum*  
19  
20 281 2009;61(12):1633-41.  
21  
22  
23 282 14. Nuesch E, Trelle S, Reichenbach S, et al. The effects of excluding patients from the  
24  
25 283 analysis in randomised controlled trials: meta-epidemiological study. *BMJ*  
26  
27 284 2009;339:b3244.  
28  
29  
30 285 15. Pildal J, Hrobjartsson A, Jorgensen KJ, et al. Impact of allocation concealment on  
31  
32 286 conclusions drawn from meta-analyses of randomized trials. *Int J Epidemiol*  
33  
34 287 2007;36(4):847-57.  
35  
36 288 16. Tierney JF, Stewart LA. Investigating patient exclusion bias in meta-analysis. *Int J*  
37  
38 289 *Epidemiol* 2005;34(1):79-87.  
39  
40  
41 290 17. Armijo-Olivo S, Saltaji H, da Costa BR, et al. What is the influence of  
42  
43 291 randomisation sequence generation and allocation concealment on treatment effects of  
44  
45 292 physical therapy trials? A meta-epidemiological study. *BMJ Open* 2015;5(9):e008562.  
46  
47 293 18. Murray CJ, Vos T, Lozano R, et al. Disability-adjusted life years (DALYs) for 291  
48  
49 294 diseases and injuries in 21 regions, 1990-2010: a systematic analysis for the Global  
50  
51 295 Burden of Disease Study 2010. *Lancet* 2012;380(9859):2197-223.  
52  
53  
54  
55  
56  
57  
58  
59  
60

- 1  
2  
3 296 19. Vos T, Flaxman AD, Naghavi M, et al. Years lived with disability (YLDs) for 1160  
4  
5 297 sequelae of 289 diseases and injuries 1990-2010: a systematic analysis for the Global  
6  
7 298 Burden of Disease Study 2010. *Lancet* 2012;380(9859):2163-96.  
8  
9  
10 299 20. Buchbinder R, Blyth FM, March LM, et al. Placing the global burden of low back  
11  
12 300 pain in context. *Best Pract Res Clin Rheumatol* 2013;27(5):575-89.  
13  
14 301 21. Shamseer L, Moher D, Clarke M, et al. Preferred reporting items for systematic  
15  
16 302 review and meta-analysis protocols (PRISMA-P) 2015: elaboration and explanation.  
17  
18 303 *BMJ* 2015;349:g7647.  
19  
20  
21 304 22. van Tulder M, Becker A, Bekkering T, et al. Chapter 3. European guidelines for the  
22  
23 305 management of acute nonspecific low back pain in primary care. *Eur Spine J* 2006;15  
24  
25 306 Suppl 2:S169-91.  
26  
27 307 23. Maher CG, Sherrington C, Herbert RD, et al. Reliability of the PEDro scale for  
28  
29 308 rating quality of randomized controlled trials. *Phys Ther* 2003;83(8):713-21.  
30  
31 309 24. Herbert RD. How to estimate treatment effects from reports of clinical trials. I:  
32  
33 310 Continuous outcomes. *Aust J Physiother* 2000;46(3):229-35.  
34  
35  
36 311 25. Higgins JP, Thompson SG, Deeks JJ, et al. Measuring inconsistency in meta-  
37  
38 312 analyses. *BMJ* 2003;327(7414):557-60.  
39  
40  
41 313 26. Nuesch E, Trelle S, Reichenbach S, et al. Small study effects in meta-analyses of  
42  
43 314 osteoarthritis trials: meta-epidemiological study. *BMJ* 2010;341:c3515.  
44  
45  
46 315  
47  
48  
49 316  
50  
51  
52  
53  
54  
55  
56  
57  
58  
59  
60

**APPENDIX 2 – Search strategy for each database****Pubmed**

1 dorsalgia.ti,ab,kw.

2 exp Back Pain/

3 “backache” ti,ab

4 (lumbar adj pain) ti,ab

5 coccyx.ti,ab

6 coccydynia.ti,ab

7 sciatica.ti,ab

8 exp sciatic neuropathy/

9 “spondylosis” ti,ab

10 “lumbago” ti,ab

11 lumbago.ti,ab,kw.

12 (disc adj degeneration) ti,ab

13 (disc adj prolapse) ti,ab

14 (disc adj herniation) ti,ab

15 OR / #1-14

16 systematic review /

17 meta-analysis /

18 (#16 OR #17)

19 (#15 AND #19)

**Embase**

1 dorsalgia.ti,ab,kw.

2 (back pain or backache or back ache).ti,ab,kw.



- 1  
2  
3 3 exp LOW BACK PAIN/  
4  
5 4 exp BACKACHE/  
6  
7 5 (lumb\$ adj3 pain).ti,ab,kw.  
8  
9  
10 6 coccyx.ti,ab,kw.  
11  
12 7 coccydynia.ti,ab,kw.  
13  
14 8 sciatica.ti,ab,kw.  
15  
16 9 sciatica/  
17  
18 10 exp ISCHIALGIA/  
19  
20  
21 11 spondylosis.mp.  
22  
23 12 lumbago.ti,ab,kw.  
24  
25 13 back disorder\$.ti,ab,kw.  
26  
27 14 or/1-13  
28  
29 15 systematic review /  
30  
31 16 meta-analysis /  
32  
33 17 (#15 OR #16)  
34  
35 18 (#14 AND #17)  
36  
37  
38  
39  
40

#### 41 **Cochrane Database of Systematic Reviews**

- 42  
43 #1 MeSH descriptor: [Back Pain] explode all trees  
44  
45 #2 dorsalgia  
46  
47 #3 backache or back ache  
48  
49 #4 MeSH descriptor: [Back Pain] explode all trees  
50  
51 #5 lumb\* near pain or coccyx or coccydynia or sciatica or spondylosis  
52  
53 #6 MeSH descriptor: [Spine] explode all trees  
54  
55 #7 MeSH descriptor: [Spinal Diseases] explode all trees  
56  
57  
58  
59  
60

- 1  
2  
3 #8 lumbago or discitis or disc near herniat\*  
4  
5 #9 spinal fusion  
6  
7 #10 facet near joint\*  
8  
9 #11 MeSH descriptor: [Intervertebral Disk] explode all trees  
10  
11 #12 postlaminectomy  
12  
13 #13 arachnoiditis  
14  
15 #14 failed near back  
16  
17 #15 MeSH descriptor: [Cauda Equina] explode all trees  
18  
19 #16 lumb\* near vertebra\*  
20  
21 #17 spinal near stenosis  
22  
23 #18 slipped near (disc\* or disk\*)  
24  
25 #19 degenerat\* near (disc\* or disk\*)  
26  
27 #20 stenosis near (spine or root or spinal)  
28  
29 #21 displace\* near (disc\* or disk\*)  
30  
31 #22 prolap\* near (disc\* or disk\*)  
32  
33 #23 MeSH descriptor: [Sciatic Neuropathy] explode all trees  
34  
35 #24 sciatic\*  
36  
37 #25 back disorder\*  
38  
39 #26 back near pain  
40  
41 #27 (#1 or #2 or #3 or #4 or #5 or #6 or #7 or #8 or #9 or #10 or #11 or #12 or #13 or  
42 #14 or #15 or #16 or #17 or #18 or #19 or #20 or #21 or #22 or #23 or #24 or #25 or  
43 #26)  
44  
45 #28 systematic review  
46  
47 #29 meta-analysis  
48  
49 #30 (#28 or #29)  
50  
51 #31 (#27 AND #30)  
52  
53  
54  
55  
56  
57  
58  
59  
60

1  
2  
3  
4  
5  
6  
7  
8  
9  
10  
11  
12  
13  
14  
15  
16  
17  
18  
19  
20  
21  
22  
23  
24  
25  
26  
27  
28  
29  
30  
31  
32  
33  
34  
35  
36  
37  
38  
39  
40  
41  
42  
43  
44  
45  
46  
47  
48  
49  
50  
51  
52  
53  
54  
55  
56  
57  
58  
59  
60

**PEDro**

Problem: Pain

AND

Body Part: lumbar spine, sacro-iliac joint or pelvis

AND

Method: systematic review

For peer review only

## PRISMA-P 2015 Checklist

This checklist has been adapted for use with protocol submissions to *Systematic Reviews* from Table 3 in Moher D et al: Preferred reporting items for systematic review and meta-analysis protocols (PRISMA-P) 2015 statement. *Systematic Reviews* 2015 4:1

| Section/topic                     | #  | Checklist item                                                                                                                                                                                  | Information reported                |                                     | Line number(s) |
|-----------------------------------|----|-------------------------------------------------------------------------------------------------------------------------------------------------------------------------------------------------|-------------------------------------|-------------------------------------|----------------|
|                                   |    |                                                                                                                                                                                                 | Yes                                 | No                                  |                |
| <b>ADMINISTRATIVE INFORMATION</b> |    |                                                                                                                                                                                                 |                                     |                                     |                |
| <b>Title</b>                      |    |                                                                                                                                                                                                 |                                     |                                     |                |
| Identification                    | 1a | Identify the report as a protocol of a systematic review                                                                                                                                        | <input checked="" type="checkbox"/> | <input type="checkbox"/>            | 1-4            |
| Update                            | 1b | If the protocol is for an update of a previous systematic review, identify as such                                                                                                              | <input type="checkbox"/>            | <input checked="" type="checkbox"/> | n/a            |
| <b>Registration</b>               | 2  | If registered, provide the name of the registry (e.g., PROSPERO) and registration number in the Abstract                                                                                        | <input checked="" type="checkbox"/> | <input type="checkbox"/>            | 53             |
| <b>Authors</b>                    |    |                                                                                                                                                                                                 |                                     |                                     |                |
| Contact                           | 3a | Provide name, institutional affiliation, and e-mail address of all protocol authors; provide physical mailing address of corresponding author                                                   | <input checked="" type="checkbox"/> | <input type="checkbox"/>            | 6-14           |
| Contributions                     | 3b | Describe contributions of protocol authors and identify the guarantor of the review                                                                                                             | <input checked="" type="checkbox"/> | <input type="checkbox"/>            | 20-22          |
| <b>Amendments</b>                 | 4  | If the protocol represents an amendment of a previously completed or published protocol, identify as such and list changes; otherwise, state plan for documenting important protocol amendments | <input type="checkbox"/>            | <input checked="" type="checkbox"/> | n/a            |
| <b>Support</b>                    |    |                                                                                                                                                                                                 |                                     |                                     |                |
| Sources                           | 5a | Indicate sources of financial or other support for the review                                                                                                                                   | <input type="checkbox"/>            | <input checked="" type="checkbox"/> | n/a            |
| Sponsor                           | 5b | Provide name for the review funder and/or sponsor                                                                                                                                               | <input type="checkbox"/>            | <input checked="" type="checkbox"/> | n/a            |
| Role of sponsor/funder            | 5c | Describe roles of funder(s), sponsor(s), and/or institution(s), if any, in developing the protocol                                                                                              | <input checked="" type="checkbox"/> | <input type="checkbox"/>            | 16-18          |
| <b>INTRODUCTION</b>               |    |                                                                                                                                                                                                 |                                     |                                     |                |
| <b>Rationale</b>                  | 6  | Describe the rationale for the review in the context of what is already known                                                                                                                   | <input checked="" type="checkbox"/> | <input type="checkbox"/>            | 76-115         |
| <b>Objectives</b>                 | 7  | Provide an explicit statement of the question(s) the review will address with reference to                                                                                                      | <input checked="" type="checkbox"/> | <input type="checkbox"/>            | 117-123        |

| Section/topic                             | #   | Checklist item                                                                                                                                                                                                                              | Information reported |                          | Line number(s)    |
|-------------------------------------------|-----|---------------------------------------------------------------------------------------------------------------------------------------------------------------------------------------------------------------------------------------------|----------------------|--------------------------|-------------------|
|                                           |     |                                                                                                                                                                                                                                             | Yes                  | No                       |                   |
|                                           |     | participants, interventions, comparators, and outcomes (PICO)                                                                                                                                                                               |                      |                          |                   |
| <b>METHODS</b>                            |     |                                                                                                                                                                                                                                             |                      |                          |                   |
| <b>Eligibility criteria</b>               | 8   | Specify the study characteristics (e.g., PICO, study design, setting, time frame) and report characteristics (e.g., years considered, language, publication status) to be used as criteria for eligibility for the review                   | X                    | <input type="checkbox"/> | 134-145           |
| <b>Information sources</b>                | 9   | Describe all intended information sources (e.g., electronic databases, contact with study authors, trial registers, or other grey literature sources) with planned dates of coverage                                                        | X                    | <input type="checkbox"/> | 146-150           |
| <b>Search strategy</b>                    | 10  | Present draft of search strategy to be used for at least one electronic database, including planned limits, such that it could be repeated                                                                                                  | X                    | <input type="checkbox"/> | Appendix 2        |
| <b>STUDY RECORDS</b>                      |     |                                                                                                                                                                                                                                             |                      |                          |                   |
| Data management                           | 11a | Describe the mechanism(s) that will be used to manage records and data throughout the review                                                                                                                                                | X                    | <input type="checkbox"/> | 198-199 / 212-214 |
| Selection process                         | 11b | State the process that will be used for selecting studies (e.g., two independent reviewers) through each phase of the review (i.e., screening, eligibility, and inclusion in meta-analysis)                                                 | X                    | <input type="checkbox"/> | 152-156           |
| Data collection process                   | 11c | Describe planned method of extracting data from reports (e.g., piloting forms, done independently, in duplicate), any processes for obtaining and confirming data from investigators                                                        | X                    | <input type="checkbox"/> | 172-174           |
| <b>Data items</b>                         | 12  | List and define all variables for which data will be sought (e.g., PICO items, funding sources), any pre-planned data assumptions and simplifications                                                                                       | X                    | <input type="checkbox"/> | 175-179           |
| <b>Outcomes and prioritization</b>        | 13  | List and define all outcomes for which data will be sought, including prioritization of main and additional outcomes, with rationale                                                                                                        | X                    | <input type="checkbox"/> | 140-142           |
| <b>Risk of bias in individual studies</b> | 14  | Describe anticipated methods for assessing risk of bias of individual studies, including whether this will be done at the outcome or study level, or both; state how this information will be used in data synthesis                        | X                    | <input type="checkbox"/> | 157-170           |
| <b>DATA</b>                               |     |                                                                                                                                                                                                                                             |                      |                          |                   |
| <b>Synthesis</b>                          | 15a | Describe criteria under which study data will be quantitatively synthesized                                                                                                                                                                 | X                    | <input type="checkbox"/> | 182-185           |
|                                           | 15b | If data are appropriate for quantitative synthesis, describe planned summary measures, methods of handling data, and methods of combining data from studies, including any planned exploration of consistency (e.g., $I^2$ , Kendall's tau) | X                    | <input type="checkbox"/> | 188-199           |

| Section/topic                            | #   | Checklist item                                                                                                              | Information reported                |                                     | Line number(s) |
|------------------------------------------|-----|-----------------------------------------------------------------------------------------------------------------------------|-------------------------------------|-------------------------------------|----------------|
|                                          |     |                                                                                                                             | Yes                                 | No                                  |                |
|                                          | 15c | Describe any proposed additional analyses (e.g., sensitivity or subgroup analyses, meta-regression)                         | <input checked="" type="checkbox"/> | <input type="checkbox"/>            | 210-214        |
|                                          | 15d | If quantitative synthesis is not appropriate, describe the type of summary planned                                          | <input type="checkbox"/>            | <input checked="" type="checkbox"/> | n/a            |
| <b>Meta-bias(es)</b>                     | 16  | Specify any planned assessment of meta-bias(es) (e.g., publication bias across studies, selective reporting within studies) | <input type="checkbox"/>            | <input checked="" type="checkbox"/> | n/a            |
| <b>Confidence in cumulative evidence</b> | 17  | Describe how the strength of the body of evidence will be assessed (e.g., GRADE)                                            | <input type="checkbox"/>            | <input checked="" type="checkbox"/> | n/a            |

# BMJ Open

## THE INFLUENCE OF ALLOCATION CONCEALMENT AND INTENTION-TO-TREAT ANALYSIS ON TREATMENT EFFECTS OF PHYSICAL THERAPY INTERVENTIONS IN LOW BACK PAIN RANDOMIZED CONTROLLED TRIALS: A PROTOCOL OF A META-EPIDEMIOLOGICAL STUDY

|                                 |                                                                                                                                                                                                                                                                                                                                                                                                         |
|---------------------------------|---------------------------------------------------------------------------------------------------------------------------------------------------------------------------------------------------------------------------------------------------------------------------------------------------------------------------------------------------------------------------------------------------------|
| Journal:                        | <i>BMJ Open</i>                                                                                                                                                                                                                                                                                                                                                                                         |
| Manuscript ID                   | bmjopen-2017-017301.R1                                                                                                                                                                                                                                                                                                                                                                                  |
| Article Type:                   | Protocol                                                                                                                                                                                                                                                                                                                                                                                                |
| Date Submitted by the Author:   | 20-Jun-2017                                                                                                                                                                                                                                                                                                                                                                                             |
| Complete List of Authors:       | Almeida, Matheus; Universidade Cidade de Sao Paulo, Masters and Doctoral Programs in Physical Therapy;<br>Saragiotto, Bruno; The University of Sydney, School of Public Health, Sydney Medical School<br>Maher, Chris; The University of Sydney, School of Public Health, Sydney Medical School<br>Costa, Leonardo; Universidade Cidade de Sao Paulo, Masters and Doctoral Programs in Physical Therapy |
| <b>Primary Subject Heading</b>: | Research methods                                                                                                                                                                                                                                                                                                                                                                                        |
| Secondary Subject Heading:      | Research methods, Evidence based practice, Rehabilitation medicine                                                                                                                                                                                                                                                                                                                                      |
| Keywords:                       | Epidemiologic Research Design, Low Back Pain, Physical Therapy Modalities                                                                                                                                                                                                                                                                                                                               |
|                                 |                                                                                                                                                                                                                                                                                                                                                                                                         |

SCHOLARONE™  
Manuscripts

1  
2  
3 1 THE INFLUENCE OF ALLOCATION CONCEALMENT AND INTENTION-  
4  
5 2 TO-TREAT ANALYSIS ON TREATMENT EFFECTS OF PHYSICAL  
6  
7 3 THERAPY INTERVENTIONS IN LOW BACK PAIN RANDOMISED  
8  
9 4 CONTROLLED TRIALS: A PROTOCOL OF A META-EPIDEMIOLOGICAL  
10  
11 5 STUDY

14 6 Matheus Oliveira de Almeida<sup>1</sup>, Bruno T Saragiotto<sup>2</sup>, Chris G Maher<sup>2</sup>, Leonardo  
15  
16 7 Oliveira Pena Costa<sup>1</sup>

18 8 <sup>1</sup>Masters and Doctoral Programs in Physical Therapy, Universidade Cidade de São  
19  
20 9 Paulo

22 10 <sup>2</sup>Sydney School of Public Health, Sydney Medical School, The University of Sydney

27 12 \***Author for correspondence:** Matheus Oliveira de Almeida

29 13 Universidade Cidade de São Paulo. Rua Cesário Galeno, 448/475, Tatuapé, São Paulo,  
30  
31 14 SP, Brazil, 05508-900. E-mail: [mathewsalmeyda@hotmail.com](mailto:mathewsalmeyda@hotmail.com)

36 16 **FUNDING STATEMENT**

38 17 Matheus Almeida is supported by São Paulo Research Foundation (FAPESP) -  
39  
40 18 grant #2016/10317-0. The funder had no role in the design of the study and will not be  
41  
42 19 involved in the interpretation or publication of the results.

45 20 **AUTHORS' CONTRIBUTIONS**

47 21 MOA, BTS, CM and LOPC conceived and designed the study. All of the authors  
48  
49 22 assisted in the final protocol and agreed to its final approval before submission.

52 23 **COMPETING INTEREST**

54 24 None



1  
2  
3 26 **ABSTRACT**

4 27 **Introduction:** Meta-epidemiological studies examining the influence of methodological  
5  
6  
7 28 such as inadequate allocation concealment and lack of intention-to-treat analysis  
8  
9 29 features have been performed in a large number of health-care areas. However, there are  
10  
11 30 no studies investigating these biases in physical therapy interventions for patients with  
12  
13 31 low back pain. The aim of this study is to investigate the influence of allocation  
14  
15 32 concealment and the use of intention-to-treat analysis on estimates of the treatment  
16  
17 33 effects of physical therapy interventions in low back pain clinical trials.

18  
19  
20 34 **Methods and analysis:** Searches on PubMed, Embase, Cochrane Database of  
21  
22 35 Systematic Reviews, PEDro and CINAHL databases will be performed. We will search  
23  
24 36 for systematic reviews that include a meta-analysis of randomised controlled trials that  
25  
26 37 compared physical therapy interventions in patients with low back pain compared with  
27  
28 38 placebo or no intervention, and have pain intensity or disability as the primary  
29  
30 39 outcomes. Information about selection (allocation concealment) and attrition bias  
31  
32 40 (intention-to-treat analysis) will be extracted from the PEDro Database for each  
33  
34 41 included trial. Information about bibliographic data, study characteristics, participants'  
35  
36 42 characteristics and study results will be extracted. A random effects model of meta-  
37  
38 43 analyses will be used to pool the treatment effects comparing trials with allocation  
39  
40 44 concealment and intention-to-treat analysis with those that did not include these  
41  
42 45 features. A meta-regression will be performed to measure the association between  
43  
44 46 methodological features and treatment effects considering each trial. The dependent  
45  
46 47 variable will be the treatment effects (the mean between-group differences) for the  
47  
48 48 primary outcomes (pain or disability), while the independent variables will be the  
49  
50 49 methodological features of interest (allocation concealment and intention-to-treat  
51  
52 50 analysis). Other covariates will include sample size and sequence generation.  
53  
54  
55  
56  
57  
58  
59  
60

1  
2  
3 51 **Ethics and dissemination:** No ethical approval will be required for this study. The  
4  
5 52 study findings will be published in a peer-reviewed journal and presented at  
6  
7 53 international conferences.

8  
9 54 **Registration number:** PROSPERO (CRD42016052347).

10  
11 55 **Keywords:** Epidemiologic Research Design; Low Back Pain; Physical Therapy  
12  
13 56 Modalities

14  
15  
16  
17 58  
18  
19 59 **Strengths and limitations of this study**

- 20  
21 60 • This protocol was specified following the Preferred Reporting Items for  
22  
23 61 Systematic review and Meta-Analyses Protocols (PRISMA - P) guidelines.  
24  
25 62 • This study will be the first one to evaluate the association between  
26  
27 63 methodological characteristics and the treatment effects of physical therapy  
28  
29 64 interventions in low back pain trials.  
30  
31 65 • The results from this meta-epidemiological study are likely to bring new insights  
32  
33 66 to the physical therapy scientific community by informing issues that need to be  
34  
35 67 considered in randomised trials.  
36  
37 68 • The findings from this meta-epidemiological study may have limited  
38  
39 69 generalisability to other clinical conditions, since it is restricted to physical  
40  
41 70 therapy treatment of low back pain.  
42  
43  
44  
45  
46  
47  
48  
49  
50  
51  
52  
53  
54  
55  
56  
57  
58  
59  
60

## 78 INTRODUCTION

79 Systematic reviews and meta-analyses of randomised controlled trials are  
80 considered the ‘gold standard’ to evaluate the efficacy and effectiveness of healthcare  
81 interventions.<sup>1,2</sup> While systematic reviews and meta-analyses provide the best available  
82 evidence to support clinical decision-making and to promote changes in health policies,  
83 they are not free of bias.<sup>3,4</sup> The presence of potential biases in clinical trials, due to  
84 inadequate allocation concealment (selection bias) or lack of intention-to-treat analysis  
85 (attrition bias) may overestimate the effect size of the interventions.<sup>5-8</sup> These types of  
86 bias can directly influence the results from meta-analyses, leading to inaccurate  
87 conclusions, misleading clinicians and researchers.<sup>9</sup>

88 Meta-epidemiological studies are designed to understand the impact of study  
89 level characteristics (i.e., methodological quality, study design) in randomised clinical  
90 trials (RCTs), investigating the association between these specific study characteristics  
91 and the intervention effect estimates from collections of meta-analyses.<sup>10,11</sup> A collection  
92 of meta-analyses is necessary, since individual meta-analyses may inaccurately estimate  
93 these effects.<sup>12</sup>

94 Some meta-epidemiological studies have been previously published. These  
95 studies evaluated the influence of methodological characteristics, such as allocation  
96 concealment and intention-to-treat (ITT) analysis on the treatment effects of clinical  
97 interventions in different healthcare areas.<sup>6,12-14</sup> Results from these studies demonstrated  
98 that trials with inadequate allocation concealment overestimated the treatment effects up  
99 to 18%.<sup>6,12</sup> Most of the meta-analyses conclusions are likely to change if only trials with  
100 adequate allocation concealment were included. It has been reported that 69% of meta-  
101 analyses were no longer statistically significant when trials with unclear or inadequate

1  
2  
3 102 allocation concealment were excluded.<sup>15</sup> In contrast, the influence of performing ITT  
4  
5 103 analysis (or attrition bias) on the effect estimates of RCTs is still unclear.<sup>12,14,16</sup>  
6

7 104 Most meta-epidemiological studies derived from reports of RCTs are from the  
8  
9 105 field of medicine. These studies are likely to be different from physical therapy trials,  
10  
11 106 especially regarding the type of intervention and outcomes assessed.<sup>17</sup> To date, there is  
12  
13 107 only one meta-epidemiological study published that evaluated the relationship between  
14  
15 108 methodological characteristics and the treatment effects of physical therapy  
16  
17 109 interventions.<sup>17</sup> This study included different areas of physical therapy and therefore,  
18  
19 110 selecting a wide range of different clinical conditions, leading to a large level of  
20  
21 111 heterogeneity that may hamper the association between the characteristics assessed and  
22  
23 112 treatment effects. Therefore, we chose to focus on low back pain trials. Besides being  
24  
25 113 the most prevalent, costly and disabling musculoskeletal condition, low back pain is the  
26  
27 114 musculoskeletal condition with largest number of clinical trials in the physiotherapy  
28  
29 115 literature.<sup>18-21</sup>  
30  
31  
32  
33

34 116 The lack of meta-epidemiological studies that have evaluated the association  
35  
36 117 between methodological characteristics and the treatment effects of interventions in low  
37  
38 118 back pain trials motivated us to conduct this study.  
39  
40

41 119

## 42 120 **OBJECTIVES**

43  
44  
45 121 The objectives of this study are: (1) to establish if adequate allocation  
46  
47 122 concealment and the use of intention to treat analysis influence the treatment effects of  
48  
49 123 physical therapy interventions in systematic reviews with meta-analysis of low back  
50  
51 124 pain RCTs when compared with systematic reviews with meta-analysis of trials without  
52  
53 125 these characteristics; (2) to evaluate if allocation concealment and intention to treat  
54  
55 126 analyses are evaluated and reported adequately in clinical trials.  
56  
57  
58  
59  
60

1  
2  
3 127

4  
5 128 **METHODS**

6  
7 129 **Study design**

8  
9  
10 130 This is a protocol of a meta-epidemiological study.

11  
12 131 **Protocol and registration**

13  
14 132 The protocol was prospectively registered at the International Prospective  
15  
16 133 Register of Systematic Reviews (PROSPERO), registration number: CRD42016052347.  
17  
18 134 We followed the Preferred Reporting Items for Systematic review and Meta-Analyses  
19  
20 135 Protocols (PRISMA - P)<sup>22</sup> guidelines and the checklist is available (see appendix 1).

21  
22 136 **Identification and selection of studies**

23  
24  
25 137 All RCTs included in systematic reviews with meta-analysis evaluating physical  
26  
27 138 therapy treatment in adults with non-specific low back pain that included pain or  
28  
29 139 disability (as continuous variables) as the main outcomes will be included in this study.  
30  
31 140 Non-specific low back pain is defined as low back pain not attributed to a specific  
32  
33 141 pathology, such as nerve root compromise or serious spinal pathology.<sup>23</sup> The physical  
34  
35 142 therapy intervention will be compared with placebo or no intervention. We will consider  
36  
37 143 all possible meta-analyses from the same systematic review, since a systematic review  
38  
39 144 may contain more than one meta-analysis (e.g different outcomes). Any systematic  
40  
41 145 reviews with meta-analysis with mixed populations will not be considered. Overview of  
42  
43 146 reviews will also not be considered in our study. In the case of Cochrane reviews, if  
44  
45 147 there are multiple versions of the same review (i.e., updates), we will consider only the  
46  
47 148 most recent one.

48  
49  
50 149 Potentially eligible studies to be included will be retrieved through an electronic  
51  
52 150 search in the following databases from their inception up to February 2017: PubMed  
53  
54 151 (<https://www.ncbi.nlm.nih.gov/pubmed>), Embase via OvidSP, Cochrane Database of  
55  
56  
57  
58  
59  
60

1  
2  
3 152 Systematic Reviews (<http://www.cochranelibrary.com/>), PEDro (<http://pedro.org.au/>)  
4  
5 153 and CINAHL (<https://health.ebsco.com/products/the-cinahl-database>). There will be no  
6  
7 154 restriction to language of studies. The search strategy will combine validated filters  
8  
9 155 related to systematic reviews and meta-analyses with physical therapy interventions on  
10  
11 156 low back pain (See appendix 2 for more details). Two review authors will  
12  
13 157 independently assess and select potential studies to be included based on titles and  
14  
15 158 abstracts. Any discordance will be solved by consensus, and if necessary, a third  
16  
17 159 evaluator will arbitrate the final decision. Full-texts of selected articles will be collected  
18  
19 160 and evaluated in the same manner. After the process of identification and selection, we  
20  
21 161 will retrieve the full-texts to extract the data. Two authors from our study are raters of  
22  
23 162 the PEDro database, so it will be possible to obtain the full texts that are indexed on this  
24  
25 163 database. It is important to state that about 92% of physical therapy RCTs are indexed  
26  
27 164 on the PEDro database.<sup>24</sup> For those RCTs not indexed on PEDro, we will make all  
28  
29 165 efforts to get these full texts (searching other databases, contact authors).  
30  
31  
32  
33  
34  
35

### 36 167 **Risk of bias assessment (selection and attrition bias)**

37  
38 168 We will extract the information about selection (allocation concealment) and  
39  
40 169 attrition bias (intention to treat analysis) from the Physiotherapy Evidence Database  
41  
42 170 (PEDro) for all trials included in the systematic reviews.<sup>25</sup> We decided to use the PEDro  
43  
44 171 scale due to the following reasons: 1) the PEDro scale has high reliability for individual  
45  
46 172 ratings and consensus ratings and can be used as a continuous scale for measuring the  
47  
48 173 methodological quality of trials;<sup>25,26</sup> 2) the PEDro scale is strongly correlated ( $r=0.83$ ;  
49  
50 174 95% CI 0.76 to 0.88) with the Cochrane Risk of Bias tool;<sup>27</sup> and 3) Feasibility: as two  
51  
52 175 authors from this study are raters from the PEDro database, we can easily download the  
53  
54 176 PEDro scores for the included RCTs in our study. The definitions used by the PEDro  
55  
56  
57  
58  
59  
60

1  
2  
3 177 database about these domains are: *allocation concealment process is considered*  
4  
5 178 *adequate, if the responsible for assignment has no information about participants*  
6  
7 179 *included in the trial and has no influence on the assignment sequence or on the decision*  
8  
9 180 *about eligibility of the participant (such as, use of sequentially sealed opaque envelopes*  
10  
11 181 *or “off-site” allocation); ITT analysis means that all participants were analyzed in the*  
12  
13 182 *groups to which they were originally allocated.*<sup>25</sup> Each domain will be rated as ‘yes’,  
14  
15 183 when the criterion is clearly satisfied, or ‘no’ when the criterion is not satisfied or the  
16  
17 184 information is unclear in the text. When the score of domain bias from an included  
18  
19 185 article is not available at the PEDro database (the article may not be indexed in PEDro  
20  
21 186 database; or the article may be in process to be rated), two assessors, not involved in the  
22  
23 187 study, will independently assess it, following the same recommendations stated above.  
24  
25 188 Any disagreements will be resolved by discussion or arbitration by a third assessor  
26  
27 189 when consensus cannot be reached. The assessors are trained raters of the PEDro scale  
28  
29 190 that work in our department and will be blinded to the scope of the manuscript.  
30  
31  
32  
33

### 34 191 **Data extraction and synthesis**

35  
36 192 Two review authors will independently extract data from all trials included in  
37  
38 193 the selected systematic reviews using a standardized extraction form. Any discordance  
39  
40 194 will also be resolved by discussion or arbitration by a third reviewer when consensus  
41  
42 195 cannot be reached.  
43  
44

45 196 We will extract bibliographic data (authors, title and year of publication), study  
46  
47 197 characteristics (design, sample size and intervention used), characteristics of the  
48  
49 198 participants (gender, age, duration and severity of the condition), outcomes results  
50  
51 199 (mean and standard deviation). We will only extract outcomes results from the short-  
52  
53 200 term follow-up (closest to 4 weeks). E-mail requests will be sent to trial authors for  
54  
55 201 additional information data, when necessary.  
56  
57  
58  
59  
60

## 202 Data analysis and synthesis

203 In order to determine whether allocation concealment and ITT analysis affect  
204 estimates of treatment effect, a two-level analysis will be conducted. Individual trial  
205 data will be retrieved from the meta-analyses included in our study. Initially, the  
206 treatment effects of each trial will be calculated using mean differences (MD) with 95%  
207 confidence intervals for between-group differences at short-term follow-up, or for  
208 between-group differences in change scores.<sup>28,29</sup> Data will be converted to a common 0  
209 to 100-point scale if trials had evaluated the same outcome on different scales. Data will  
210 be presented separately for each outcome of interest (pain and disability).

211 After establishing the treatment effects for the trials included, we will calculate a  
212 pooled treatment effect estimate for each meta-analysis by using a random effects  
213 model: one corresponding to the pooled effect size from trials with the characteristics of  
214 interest (allocation concealment and ITT analysis) and the other for studies without  
215 these characteristics for each outcome. Data will be presented separately for each  
216 characteristic of interest. After calculating meta-analyses with individual trial data, we  
217 will calculate the difference in treatment effects between trials with the characteristics  
218 of interest (allocation concealment and ITT analysis) and those without these  
219 characteristics.

220 We will assess between-trial heterogeneity using I-squared test ( $I^2$ ). This test  
221 demonstrates whether the percentage of total variation across studies is explained by  
222 heterogeneity rather than chance. An  $I^2$  higher than 75% will be considered as 'high  
223 heterogeneity', an  $I^2$  of 50% to 75% will be considered as 'moderate heterogeneity', and  
224 an  $I^2$  lower than 25% will be considered as 'low heterogeneity'.<sup>30</sup> Review Manager  
225 (RevMan) version 5 software will be used for all meta-analyses and heterogeneity  
226 assessment.



1  
2  
3 227 The second stage of the analysis will be a meta-regression to evaluate the  
4  
5 228 association between methodological characteristics of included trials and the treatment  
6  
7 229 effects.<sup>11</sup> The dependent variable will be the treatment effects (mean between-group  
8  
9 230 difference) for the main outcomes (pain or disability), while the independent variables  
10  
11 231 will be the methodological characteristics of interest (allocation concealment and ITT  
12  
13 232 analysis). Additionally, we will use two independent covariates in meta-regression  
14  
15 233 analysis: sample size and sequence generation. We decided to investigate the effect of  
16  
17 234 sequence generation and sample size since these variables have been associated with  
18  
19 235 treatment effect estimates.<sup>31</sup> Sequence generation assessment is considered adequate  
20  
21 236 when subjects were randomly allocated to groups (e.g., computer-generated random  
22  
23 237 numbers; coin-tossing and dice-rolling).<sup>25</sup> The sample size will be considered as a  
24  
25 238 continuous quantitative variable in the meta-regression model. The covariates will be  
26  
27 239 used according to the number of studies included. For each 10 trials, one covariate will  
28  
29 240 be incorporated to the analysis. Random-effects meta-regression will be conducted  
30  
31 241 using the ‘metareg’ command in STATA 10 and weighted using effect size standard  
32  
33 242 errors.<sup>11</sup>  
34  
35  
36  
37  
38  
39

243

## 244 **DISCUSSION**

245 To our knowledge, this is the first study aimed to investigate if meta-analyses’  
246 findings and the magnitude of the treatment effects of physical therapy interventions in  
247 low back pain RCTs could be influenced by methodological features (i.e., allocation  
248 concealment and ITT analysis). Meta-analyses from RCTs are responsible for the most  
249 reliable evidence on the treatment of patients with low-back pain, and its results are of  
250 interest to a range of stakeholders.

1  
2  
3 251 However, biased results from RCTs can lead to inadequate clinical decision-  
4  
5 252 making and consequently affect patient outcomes. Clinicians may select interventions  
6  
7 253 for their patients based on trials results that are inflated, and so these are not a very  
8  
9 254 reliable guide to treatment selection. For example, a systematic review about the  
10  
11 255 effectiveness of low level laser therapy for chronic LBP found a significantly greater  
12  
13 256 reduction in pain in response to laser therapy compared to placebo.<sup>32</sup> However, this  
14  
15 257 finding was based on a meta-analysis with three clinical trials that did not conceal  
16  
17 258 allocation or use an ITT analysis, so this result could be an overestimate of the true  
18  
19 259 effect of laser. If this premise of overestimated effect is true, clinicians might in good  
20  
21 260 faith select interventions that might not help their patients.  
22

23  
24  
25 261 Therefore, we believe that the findings of this meta-epidemiological study will  
26  
27 262 provide important contributions to clinicians, researchers, and policy-makers in the low-  
28  
29 263 back pain field. This study will improve the available evidence for physical therapists,  
30  
31 264 through the disclosure of reliable and unbiased results on clinical decision-making. It  
32  
33 265 will also help promoting better politics of evidence-based in this area by detecting  
34  
35 266 possible issues while interpreting trials of physical therapy interventions for patients  
36  
37 267 with back pain.  
38  
39

40  
41 268 The present meta-epidemiological study has a number of strengths. Since this  
42  
43 269 approach is similar to a systematic review, we will pre-specify methods to identify and  
44  
45 270 select studies to be included through pre-defined inclusion criteria and sensitive search  
46  
47 271 strategy. Data extraction and analysis will be also performed by rigorous methods to  
48  
49 272 avoid potential bias in this study.  
50

51  
52 273 The limitation of the present study is the fact that it is restricted to meta-analyses  
53  
54 274 of physical therapy interventions in non-specific low back pain. Thus, our results may  
55  
56  
57  
58  
59  
60

1  
2  
3 275 have limited generalizability to other interventions as well as to other clinical  
4  
5 276 conditions.

7 277 **Dissemination**

9 278 We intend to disseminate our results through presentations at national and  
10  
11 279 international conferences (e.g., World Confederation for Physical Therapy and  
12  
13 280 International Back and Neck Pain Forum) as well as publishing our study in a high-  
14  
15 281 impact international scientific journal.  
16  
17  
18  
19

20  
21 283 **COMPETING INTEREST**

22  
23 284 None  
24  
25  
26

27 286 **REFERENCES**

- 28  
29 287 1. Cook DJ, Mulrow CD, Haynes RB. Systematic reviews: synthesis of best evidence  
30  
31 288 for clinical decisions. *Ann Intern Med* 1997;126(5):376-80.  
32  
33 289 2. Egger M, Smith GD. Meta-Analysis. Potentials and promise. *BMJ*  
34  
35 290 1997;315(7119):1371-4.  
36  
37 291 3. Hemila H. Re: "Bias in clinical intervention research". *Am J Epidemiol*  
38  
39 292 2007;165(10):1219; author reply -20.  
40  
41 293 4. Juni P, Altman DG, Egger M. Systematic reviews in health care: Assessing the  
42  
43 294 quality of controlled clinical trials. *BMJ* 2001;323(7303):42-6.  
44  
45 295 5. Gluud LL. Bias in clinical intervention research. *Am J Epidemiol* 2006;163(6):493-  
46  
47 296 501.  
48  
49 297 6. Schulz KF, Chalmers I, Hayes RJ, et al. Empirical evidence of bias. Dimensions of  
50  
51 298 methodological quality associated with estimates of treatment effects in controlled  
52  
53 299 trials. *JAMA* 1995;273(5):408-12.  
54  
55  
56  
57  
58  
59  
60

- 1  
2  
3 300 7. Moher D, Pham B, Jones A, et al. Does quality of reports of randomised trials affect  
4  
5 301 estimates of intervention efficacy reported in meta-analyses? *Lancet*  
6  
7 302 1998;352(9128):609-13.  
8  
9  
10 303 8. Kjaergard LL, Villumsen J, Gluud C. Reported methodologic quality and  
11  
12 304 discrepancies between large and small randomized trials in meta-analyses. *Ann Intern*  
13  
14 305 *Med* 2001;135(11):982-9.  
15  
16 306 9. Turner L, Boutron I, Hrobjartsson A, et al. The evolution of assessing bias in  
17  
18 307 Cochrane systematic reviews of interventions: celebrating methodological contributions  
19  
20 308 of the Cochrane Collaboration. *Syst Rev* 2013;2:79.  
21  
22  
23 309 10. Naylor CD. Meta-analysis and the meta-epidemiology of clinical research. *BMJ*  
24  
25 310 1997;315(7109):617-9.  
26  
27 311 11. Sterne JA, Juni P, Schulz KF, et al. Statistical methods for assessing the influence of  
28  
29 312 study characteristics on treatment effects in 'meta-epidemiological' research. *Stat Med*  
30  
31 313 2002;21(11):1513-24.  
32  
33  
34 314 12. Wood L, Egger M, Gluud LL, et al. Empirical evidence of bias in treatment effect  
35  
36 315 estimates in controlled trials with different interventions and outcomes: meta-  
37  
38 316 epidemiological study. *BMJ* 2008;336(7644):601-5.  
39  
40  
41 317 13. Nuesch E, Reichenbach S, Trelle S, et al. The importance of allocation concealment  
42  
43 318 and patient blinding in osteoarthritis trials: a meta-epidemiologic study. *Arthritis Rheum*  
44  
45 319 2009;61(12):1633-41.  
46  
47 320 14. Nuesch E, Trelle S, Reichenbach S, et al. The effects of excluding patients from the  
48  
49 321 analysis in randomised controlled trials: meta-epidemiological study. *BMJ*  
50  
51 322 2009;339:b3244.  
52  
53  
54  
55  
56  
57  
58  
59  
60

- 1  
2  
3 323 15. Pildal J, Hrobjartsson A, Jorgensen KJ, et al. Impact of allocation concealment on  
4  
5 324 conclusions drawn from meta-analyses of randomized trials. *Int J Epidemiol*  
6  
7 325 2007;36(4):847-57.  
8  
9  
10 326 16. Tierney JF, Stewart LA. Investigating patient exclusion bias in meta-analysis. *Int J*  
11  
12 327 *Epidemiol* 2005;34(1):79-87.  
13  
14 328 17. Armijo-Olivo S, Saltaji H, da Costa BR, et al. What is the influence of  
15  
16 329 randomisation sequence generation and allocation concealment on treatment effects of  
17  
18 330 physical therapy trials? A meta-epidemiological study. *BMJ Open* 2015;5(9):e008562.  
19  
20  
21 331 18. Murray CJ, Vos T, Lozano R, et al. Disability-adjusted life years (DALYs) for 291  
22  
23 332 diseases and injuries in 21 regions, 1990-2010: a systematic analysis for the Global  
24  
25 333 Burden of Disease Study 2010. *Lancet* 2012;380(9859):2197-223.  
26  
27 334 19. Vos T, Flaxman AD, Naghavi M, et al. Years lived with disability (YLDs) for 1160  
28  
29 335 sequelae of 289 diseases and injuries 1990-2010: a systematic analysis for the Global  
30  
31 336 Burden of Disease Study 2010. *Lancet* 2012;380(9859):2163-96.  
32  
33  
34 337 20. Buchbinder R, Blyth FM, March LM, et al. Placing the global burden of low back  
35  
36 338 pain in context. *Best Pract Res Clin Rheumatol* 2013;27(5):575-89.  
37  
38 339 21. Beattie PF, Silfies SP, Jordon M. The evolving role of physical therapists in the  
39  
40 340 long-term management of chronic low back pain: longitudinal care using assisted self-  
41  
42 341 management strategies. *Braz J Phys Ther* 2016;20(6):580-91.  
43  
44  
45 342 22. Shamseer L, Moher D, Clarke M, et al. Preferred reporting items for systematic  
46  
47 343 review and meta-analysis protocols (PRISMA-P) 2015: elaboration and explanation.  
48  
49 344 *BMJ* 2015;349:g7647.  
50  
51  
52 345 23. van Tulder M, Becker A, Bekkering T, et al. Chapter 3. European guidelines for the  
53  
54 346 management of acute nonspecific low back pain in primary care. *Eur Spine J* 2006;15  
55  
56 347 Suppl 2:S169-91.  
57  
58  
59  
60

- 1  
2  
3 348 24. Michaleff ZA, Costa LO, Moseley AM, et al. CENTRAL, PEDro, PubMed, and  
4  
5 349 EMBASE are the most comprehensive databases indexing randomized controlled trials  
6  
7 350 of physical therapy interventions. *Phys Ther* 2011;91(2):190-7.  
8  
9 351 25. Maher CG, Sherrington C, Herbert RD, et al. Reliability of the PEDro scale for  
10  
11 352 rating quality of randomized controlled trials. *Phys Ther* 2003;83(8):713-21.  
12  
13 353 26. Shiwa SR, Costa LO, Costa LM, et al. Reproducibility of the Portuguese version of  
14  
15 354 the PEDro Scale. *Cad Saude Publica* 2011;27(10):2063-68.  
16  
17  
18 355 27. Yamato TP, Maher C, Koes B, et al. The PEDro scale had acceptably high  
19  
20 356 convergent validity, construct validity, and interrater reliability in evaluating  
21  
22 357 methodological quality of pharmaceutical trials. *J Clin Epidemiol* 2017.  
23  
24  
25 358 28. Higgins JPT, Green S. Cochrane Handbook for Systematic Reviews of Interventions  
26  
27 359 Version 5.1.0 (updated March 2011)2011.  
28  
29  
30 360 29. Herbert RD. How to estimate treatment effects from reports of clinical trials. I:  
31  
32 361 Continuous outcomes. *Aust J Physiother* 2000;46(3):229-35.  
33  
34 362 30. Higgins JP, Thompson SG, Deeks JJ, et al. Measuring inconsistency in meta-  
35  
36 363 analyses. *BMJ* 2003;327(7414):557-60.  
37  
38  
39 364 31. Dechartres A, Trinquart L, Faber T, et al. Empirical evaluation of which trial  
40  
41 365 characteristics are associated with treatment effect estimates. *J Clin Epidemiol*  
42  
43 366 2016;77:24-37.  
44  
45 367 32. Huang Z, Ma J, Chen J, et al. The effectiveness of low-level laser therapy for  
46  
47 368 nonspecific chronic low back pain: a systematic review and meta-analysis. *Arthritis Res*  
48  
49 369 *Ther* 2015;17:360.  
50  
51  
52  
53 370  
54  
55  
56 371  
57  
58  
59  
60

## APPENDIX 2 – PRISMA-P 2015 Checklist

This checklist has been adapted for use with protocol submissions to *Systematic Reviews* from Table 3 in Moher D et al: Preferred reporting items for systematic review and meta-analysis protocols (PRISMA-P) 2015 statement. *Systematic Reviews* 2015 4:1

| Section/topic                     | #  | Checklist item                                                                                                                                                                                  | Information reported     |                          | Line number(s) |
|-----------------------------------|----|-------------------------------------------------------------------------------------------------------------------------------------------------------------------------------------------------|--------------------------|--------------------------|----------------|
|                                   |    |                                                                                                                                                                                                 | Yes                      | No                       |                |
| <b>ADMINISTRATIVE INFORMATION</b> |    |                                                                                                                                                                                                 |                          |                          |                |
| <b>Title</b>                      |    |                                                                                                                                                                                                 |                          |                          |                |
| Identification                    | 1a | Identify the report as a protocol of a systematic review                                                                                                                                        | X                        | <input type="checkbox"/> | 1-5            |
| Update                            | 1b | If the protocol is for an update of a previous systematic review, identify as such                                                                                                              | <input type="checkbox"/> | X                        | n/a            |
| <b>Registration</b>               | 2  | If registered, provide the name of the registry (e.g., PROSPERO) and registration number in the Abstract                                                                                        | X                        | <input type="checkbox"/> | 57             |
| <b>Authors</b>                    |    |                                                                                                                                                                                                 |                          |                          |                |
| Contact                           | 3a | Provide name, institutional affiliation, and e-mail address of all protocol authors; provide physical mailing address of corresponding author                                                   | X                        | <input type="checkbox"/> | 6-14           |
| Contributions                     | 3b | Describe contributions of protocol authors and identify the guarantor of the review                                                                                                             | X                        | <input type="checkbox"/> | 20-22          |
| <b>Amendments</b>                 | 4  | If the protocol represents an amendment of a previously completed or published protocol, identify as such and list changes; otherwise, state plan for documenting important protocol amendments | <input type="checkbox"/> | X                        | n/a            |
| <b>Support</b>                    |    |                                                                                                                                                                                                 |                          |                          |                |
| Sources                           | 5a | Indicate sources of financial or other support for the review                                                                                                                                   | X                        | <input type="checkbox"/> | 16-19          |
| Sponsor                           | 5b | Provide name for the review funder and/or sponsor                                                                                                                                               | X                        | <input type="checkbox"/> | 16-19          |
| Role of sponsor/funder            | 5c | Describe roles of funder(s), sponsor(s), and/or institution(s), if any, in developing the protocol                                                                                              | X                        | <input type="checkbox"/> | 16-19          |
| <b>INTRODUCTION</b>               |    |                                                                                                                                                                                                 |                          |                          |                |
| <b>Rationale</b>                  | 6  | Describe the rationale for the review in the context of what is already known                                                                                                                   | X                        | <input type="checkbox"/> | 79-119         |
| <b>Objectives</b>                 | 7  | Provide an explicit statement of the question(s) the review will address with reference to participants, interventions, comparators, and outcomes (PICO)                                        | X                        | <input type="checkbox"/> | 121-127        |

| Section/topic                      | #   | Checklist item                                                                                                                                                                                                                              | Information reported     |                          | Line number(s) |
|------------------------------------|-----|---------------------------------------------------------------------------------------------------------------------------------------------------------------------------------------------------------------------------------------------|--------------------------|--------------------------|----------------|
|                                    |     |                                                                                                                                                                                                                                             | Yes                      | No                       |                |
| <b>METHODS</b>                     |     |                                                                                                                                                                                                                                             |                          |                          |                |
| Eligibility criteria               | 8   | Specify the study characteristics (e.g., PICO, study design, setting, time frame) and report characteristics (e.g., years considered, language, publication status) to be used as criteria for eligibility for the review                   | X                        | <input type="checkbox"/> | 137-149        |
| Information sources                | 9   | Describe all intended information sources (e.g., electronic databases, contact with study authors, trial registers, or other grey literature sources) with planned dates of coverage                                                        | X                        | <input type="checkbox"/> | 150-157        |
| Search strategy                    | 10  | Present draft of search strategy to be used for at least one electronic database, including planned limits, such that it could be repeated                                                                                                  | X                        | <input type="checkbox"/> | Appendix 2     |
| <b>STUDY RECORDS</b>               |     |                                                                                                                                                                                                                                             |                          |                          |                |
| Data management                    | 11a | Describe the mechanism(s) that will be used to manage records and data throughout the review                                                                                                                                                | X                        | <input type="checkbox"/> | 193-194        |
| Selection process                  | 11b | State the process that will be used for selecting studies (e.g., two independent reviewers) through each phase of the review (i.e., screening, eligibility, and inclusion in meta-analysis)                                                 | X                        | <input type="checkbox"/> | 157-161        |
| Data collection process            | 11c | Describe planned method of extracting data from reports (e.g., piloting forms, done independently, in duplicate), any processes for obtaining and confirming data from investigators                                                        | X                        | <input type="checkbox"/> | 192-196        |
| Data items                         | 12  | List and define all variables for which data will be sought (e.g., PICO items, funding sources), any pre-planned data assumptions and simplifications                                                                                       | X                        | <input type="checkbox"/> | 197-200        |
| Outcomes and prioritization        | 13  | List and define all outcomes for which data will be sought, including prioritization of main and additional outcomes, with rationale                                                                                                        | X                        | <input type="checkbox"/> | 139-140        |
| Risk of bias in individual studies | 14  | Describe anticipated methods for assessing risk of bias of individual studies, including whether this will be done at the outcome or study level, or both; state how this information will be used in data synthesis                        | X                        | <input type="checkbox"/> | 168-191        |
| <b>DATA</b>                        |     |                                                                                                                                                                                                                                             |                          |                          |                |
| Synthesis                          | 15a | Describe criteria under which study data will be quantitatively synthesized                                                                                                                                                                 | X                        | <input type="checkbox"/> | 203-211        |
|                                    | 15b | If data are appropriate for quantitative synthesis, describe planned summary measures, methods of handling data, and methods of combining data from studies, including any planned exploration of consistency (e.g., $I^2$ , Kendall's tau) | X                        | <input type="checkbox"/> | 212-227        |
|                                    | 15c | Describe any proposed additional analyses (e.g., sensitivity or subgroup analyses, meta-regression)                                                                                                                                         | X                        | <input type="checkbox"/> | 228-243        |
|                                    | 15d | If quantitative synthesis is not appropriate, describe the type of summary planned                                                                                                                                                          | <input type="checkbox"/> | X                        | n/a            |
| Meta-bias(es)                      | 16  | Specify any planned assessment of meta-bias(es) (e.g., publication bias across studies, selective                                                                                                                                           | <input type="checkbox"/> | X                        | n/a            |



| Section/topic                            | #  | Checklist item                                                                   | Information reported     |          | Line number(s) |
|------------------------------------------|----|----------------------------------------------------------------------------------|--------------------------|----------|----------------|
|                                          |    |                                                                                  | Yes                      | No       |                |
|                                          |    | reporting within studies)                                                        |                          |          |                |
| <b>Confidence in cumulative evidence</b> | 17 | Describe how the strength of the body of evidence will be assessed (e.g., GRADE) | <input type="checkbox"/> | <b>X</b> | n/a            |

For peer review only

**APPENDIX 2 – Search strategy for each database****Pubmed**

1 dorsalgia.ti,ab,kw.

2 exp Back Pain/

3 “backache” ti,ab

4 (lumbar adj pain) ti,ab

5 coccyx.ti,ab

6 coccydynia.ti,ab

7 sciatica.ti,ab

8 exp sciatic neuropathy/

9 “spondylosis” ti,ab

10 “lumbago” ti,ab

11 lumbago.ti,ab,kw.

12 (disc adj degeneration) ti,ab

13 (disc adj prolapse) ti,ab

14 (disc adj herniation) ti,ab

15 OR / #1-14

16 systematic review /

17 meta-analysis /

18 (#16 OR #17)

19 (#15 AND #19)

**Embase**

1 dorsalgia.ti,ab,kw.

2 (back pain or backache or back ache).ti,ab,kw.

- 1  
2  
3 3 exp LOW BACK PAIN/  
4  
5  
6 4 exp BACKACHE/  
7  
8 5 (lumb\$ adj3 pain).ti,ab,kw.  
9  
10 6 coccyx.ti,ab,kw.  
11  
12 7 coccydynia.ti,ab,kw.  
13  
14  
15 8 sciatica.ti,ab,kw.  
16  
17 9 sciatica/  
18  
19 10 exp ISCHIALGIA/  
20  
21 11 spondylosis.mp.  
22  
23 12 lumbago.ti,ab,kw.  
24  
25 13 back disorder\$.ti,ab,kw.  
26  
27 14 or/1-13  
28  
29 15 systematic review /  
30  
31 16 meta-analysis /  
32  
33 17 (#15 OR #16)  
34  
35 18 (#14 AND #17)  
36  
37  
38  
39  
40  
41  
42  
43

#### 44 **Cochrane Database of Systematic Reviews**

45  
46 #1 MeSH descriptor: [Back Pain] explode all trees

47  
48 #2 dorsalgia

49  
50 #3 backache or back ache

51  
52 #4 MeSH descriptor: [Back Pain] explode all trees

53  
54 #5 lumb\* near pain or coccyx or coccydynia or sciatica or spondylosis

55  
56 #6 MeSH descriptor: [Spine] explode all trees

57  
58 #7 MeSH descriptor: [Spinal Diseases] explode all trees  
59  
60

- 1  
2  
3 #8 lumbago or discitis or disc near herniat\*  
4  
5  
6 #9 spinal fusion  
7  
8 #10 facet near joint\*  
9  
10 #11 MeSH descriptor: [Intervertebral Disk] explode all trees  
11  
12 #12 postlaminectomy  
13  
14  
15 #13 arachnoiditis  
16  
17  
18 #14 failed near back  
19  
20 #15 MeSH descriptor: [Cauda Equina] explode all trees  
21  
22 #16 lumb\* near vertebra\*  
23  
24  
25 #17 spinal near stenosis  
26  
27 #18 slipped near (disc\* or disk\*)  
28  
29 #19 degenerat\* near (disc\* or disk\*)  
30  
31 #20 stenosis near (spine or root or spinal)  
32  
33 #21 displace\* near (disc\* or disk\*)  
34  
35 #22 prolap\* near (disc\* or disk\*)  
36  
37  
38 #23 MeSH descriptor: [Sciatic Neuropathy] explode all trees  
39  
40  
41 #24 sciatic\*  
42  
43  
44 #25 back disorder\*  
45  
46 #26 back near pain  
47  
48 #27 (#1 or #2 or #3 or #4 or #5 or #6 or #7 or #8 or #9 or #10 or #11 or #12 or #13 or  
49 #14 or #15 or #16 or #17 or #18 or #19 or #20 or #21 or #22 or #23 or #24 or #25 or  
50 #26)  
51  
52  
53 #28 systematic review  
54  
55 #29 meta-analysis  
56  
57  
58 #30 (#28 or #29)  
59  
60 #31 (#27 AND #30)

**PEDro**

Problem: Pain

AND

Body Part: lumbar spine, sacro-iliac joint or pelvis

AND

Method: systematic review

**CINAHL**

S1 "lumbago"

S2 (MH "Spondylolisthesis") OR (MH "Spondylolysis")

S3 (MH "Thoracic Vertebrae")

S4 S1 or S2 or S3

S5 lumbar N2 vertebra

S6 (MH "Lumbar Vertebrae")

S7 "coccydynia"

S8 "coccyx"

S9 "sciatica"

S10 (MH "Sciatica")

S11 (MH "Coccyx")

S12 S5 or S6 or S7 or S8 or S9 or S10 or S11

S13 backache or "back ache"

S14 lumb\* W3 pain

S15 back pain

S16 (MH "Low Back Pain")

S17 (MH "Back Pain+")

1  
2  
3  
4  
5  
6  
7  
8  
9  
10  
11  
12  
13  
14  
15  
16  
17  
18  
19  
20  
21  
22  
23  
24  
25  
26  
27  
28  
29  
30  
31  
32  
33  
34  
35  
36  
37  
38  
39  
40  
41  
42  
43  
44  
45  
46  
47  
48  
49  
50  
51  
52  
53  
54  
55  
56  
57  
58  
59  
60

S18 "dorsalgia"

S19 S13 S14 or S15 or S16 or S17 or S18 or S34

S20 S4 or S12 or S19

S21 systematic review

S22 meta-analysis

S23 S21 or S22

S24 S20 and S23

For peer review only

## PRISMA-P 2015 Checklist

This checklist has been adapted for use with protocol submissions to *Systematic Reviews* from Table 3 in Moher D et al: Preferred reporting items for systematic review and meta-analysis protocols (PRISMA-P) 2015 statement. *Systematic Reviews* 2015 4:1

| Section/topic                     | #  | Checklist item                                                                                                                                                                                  | Information reported                |                                     | Line number(s) |
|-----------------------------------|----|-------------------------------------------------------------------------------------------------------------------------------------------------------------------------------------------------|-------------------------------------|-------------------------------------|----------------|
|                                   |    |                                                                                                                                                                                                 | Yes                                 | No                                  |                |
| <b>ADMINISTRATIVE INFORMATION</b> |    |                                                                                                                                                                                                 |                                     |                                     |                |
| <b>Title</b>                      |    |                                                                                                                                                                                                 |                                     |                                     |                |
| Identification                    | 1a | Identify the report as a protocol of a systematic review                                                                                                                                        | <input checked="" type="checkbox"/> | <input type="checkbox"/>            | 1-5            |
| Update                            | 1b | If the protocol is for an update of a previous systematic review, identify as such                                                                                                              | <input type="checkbox"/>            | <input checked="" type="checkbox"/> | n/a            |
| <b>Registration</b>               | 2  | If registered, provide the name of the registry (e.g., PROSPERO) and registration number in the Abstract                                                                                        | <input checked="" type="checkbox"/> | <input type="checkbox"/>            | 57             |
| <b>Authors</b>                    |    |                                                                                                                                                                                                 |                                     |                                     |                |
| Contact                           | 3a | Provide name, institutional affiliation, and e-mail address of all protocol authors; provide physical mailing address of corresponding author                                                   | <input checked="" type="checkbox"/> | <input type="checkbox"/>            | 6-14           |
| Contributions                     | 3b | Describe contributions of protocol authors and identify the guarantor of the review                                                                                                             | <input checked="" type="checkbox"/> | <input type="checkbox"/>            | 20-22          |
| <b>Amendments</b>                 | 4  | If the protocol represents an amendment of a previously completed or published protocol, identify as such and list changes; otherwise, state plan for documenting important protocol amendments | <input type="checkbox"/>            | <input checked="" type="checkbox"/> | n/a            |
| <b>Support</b>                    |    |                                                                                                                                                                                                 |                                     |                                     |                |
| Sources                           | 5a | Indicate sources of financial or other support for the review                                                                                                                                   | <input checked="" type="checkbox"/> | <input type="checkbox"/>            | 16-19          |
| Sponsor                           | 5b | Provide name for the review funder and/or sponsor                                                                                                                                               | <input checked="" type="checkbox"/> | <input type="checkbox"/>            | 16-19          |
| Role of sponsor/funder            | 5c | Describe roles of funder(s), sponsor(s), and/or institution(s), if any, in developing the protocol                                                                                              | <input checked="" type="checkbox"/> | <input type="checkbox"/>            | 16-19          |
| <b>INTRODUCTION</b>               |    |                                                                                                                                                                                                 |                                     |                                     |                |
| <b>Rationale</b>                  | 6  | Describe the rationale for the review in the context of what is already known                                                                                                                   | <input checked="" type="checkbox"/> | <input type="checkbox"/>            | 79-119         |
| <b>Objectives</b>                 | 7  | Provide an explicit statement of the question(s) the review will address with reference to                                                                                                      | <input checked="" type="checkbox"/> | <input type="checkbox"/>            | 121-127        |

| Section/topic                             | #   | Checklist item                                                                                                                                                                                                                              | Information reported |                          | Line number(s) |
|-------------------------------------------|-----|---------------------------------------------------------------------------------------------------------------------------------------------------------------------------------------------------------------------------------------------|----------------------|--------------------------|----------------|
|                                           |     |                                                                                                                                                                                                                                             | Yes                  | No                       |                |
|                                           |     | participants, interventions, comparators, and outcomes (PICO)                                                                                                                                                                               |                      |                          |                |
| <b>METHODS</b>                            |     |                                                                                                                                                                                                                                             |                      |                          |                |
| <b>Eligibility criteria</b>               | 8   | Specify the study characteristics (e.g., PICO, study design, setting, time frame) and report characteristics (e.g., years considered, language, publication status) to be used as criteria for eligibility for the review                   | X                    | <input type="checkbox"/> | 137-149        |
| <b>Information sources</b>                | 9   | Describe all intended information sources (e.g., electronic databases, contact with study authors, trial registers, or other grey literature sources) with planned dates of coverage                                                        | X                    | <input type="checkbox"/> | 150-157        |
| <b>Search strategy</b>                    | 10  | Present draft of search strategy to be used for at least one electronic database, including planned limits, such that it could be repeated                                                                                                  | X                    | <input type="checkbox"/> | Appendix 2     |
| <b>STUDY RECORDS</b>                      |     |                                                                                                                                                                                                                                             |                      |                          |                |
| Data management                           | 11a | Describe the mechanism(s) that will be used to manage records and data throughout the review                                                                                                                                                | X                    | <input type="checkbox"/> | 193-194        |
| Selection process                         | 11b | State the process that will be used for selecting studies (e.g., two independent reviewers) through each phase of the review (i.e., screening, eligibility, and inclusion in meta-analysis)                                                 | X                    | <input type="checkbox"/> | 157-161        |
| Data collection process                   | 11c | Describe planned method of extracting data from reports (e.g., piloting forms, done independently, in duplicate), any processes for obtaining and confirming data from investigators                                                        | X                    | <input type="checkbox"/> | 192-196        |
| <b>Data items</b>                         | 12  | List and define all variables for which data will be sought (e.g., PICO items, funding sources), any pre-planned data assumptions and simplifications                                                                                       | X                    | <input type="checkbox"/> | 197-200        |
| <b>Outcomes and prioritization</b>        | 13  | List and define all outcomes for which data will be sought, including prioritization of main and additional outcomes, with rationale                                                                                                        | X                    | <input type="checkbox"/> | 139-140        |
| <b>Risk of bias in individual studies</b> | 14  | Describe anticipated methods for assessing risk of bias of individual studies, including whether this will be done at the outcome or study level, or both; state how this information will be used in data synthesis                        | X                    | <input type="checkbox"/> | 168-191        |
| <b>DATA</b>                               |     |                                                                                                                                                                                                                                             |                      |                          |                |
| <b>Synthesis</b>                          | 15a | Describe criteria under which study data will be quantitatively synthesized                                                                                                                                                                 | X                    | <input type="checkbox"/> | 203-211        |
|                                           | 15b | If data are appropriate for quantitative synthesis, describe planned summary measures, methods of handling data, and methods of combining data from studies, including any planned exploration of consistency (e.g., $I^2$ , Kendall's tau) | X                    | <input type="checkbox"/> | 212-227        |
|                                           | 15c | Describe any proposed additional analyses (e.g., sensitivity or subgroup analyses, meta-                                                                                                                                                    | X                    | <input type="checkbox"/> | 228-243        |



| Section/topic                            | #   | Checklist item                                                                                                              | Information reported     |          | Line number(s) |
|------------------------------------------|-----|-----------------------------------------------------------------------------------------------------------------------------|--------------------------|----------|----------------|
|                                          |     |                                                                                                                             | Yes                      | No       |                |
|                                          |     | regression)                                                                                                                 |                          |          |                |
|                                          | 15d | If quantitative synthesis is not appropriate, describe the type of summary planned                                          | <input type="checkbox"/> | <b>X</b> | n/a            |
| <b>Meta-bias(es)</b>                     | 16  | Specify any planned assessment of meta-bias(es) (e.g., publication bias across studies, selective reporting within studies) | <input type="checkbox"/> | <b>X</b> | n/a            |
| <b>Confidence in cumulative evidence</b> | 17  | Describe how the strength of the body of evidence will be assessed (e.g., GRADE)                                            | <input type="checkbox"/> | <b>X</b> | n/a            |

peer review only

# BMJ Open

## THE INFLUENCE OF ALLOCATION CONCEALMENT AND INTENTION-TO-TREAT ANALYSIS ON TREATMENT EFFECTS OF PHYSICAL THERAPY INTERVENTIONS IN LOW BACK PAIN RANDOMIZED CONTROLLED TRIALS: A PROTOCOL OF A META-EPIDEMIOLOGICAL STUDY

|                                 |                                                                                                                                                                                                                                                                                                                                                                                                         |
|---------------------------------|---------------------------------------------------------------------------------------------------------------------------------------------------------------------------------------------------------------------------------------------------------------------------------------------------------------------------------------------------------------------------------------------------------|
| Journal:                        | <i>BMJ Open</i>                                                                                                                                                                                                                                                                                                                                                                                         |
| Manuscript ID                   | bmjopen-2017-017301.R2                                                                                                                                                                                                                                                                                                                                                                                  |
| Article Type:                   | Protocol                                                                                                                                                                                                                                                                                                                                                                                                |
| Date Submitted by the Author:   | 01-Aug-2017                                                                                                                                                                                                                                                                                                                                                                                             |
| Complete List of Authors:       | Almeida, Matheus; Universidade Cidade de Sao Paulo, Masters and Doctoral Programs in Physical Therapy;<br>Saragiotto, Bruno; The University of Sydney, School of Public Health, Sydney Medical School<br>Maher, Chris; The University of Sydney, School of Public Health, Sydney Medical School<br>Costa, Leonardo; Universidade Cidade de Sao Paulo, Masters and Doctoral Programs in Physical Therapy |
| <b>Primary Subject Heading</b>: | Research methods                                                                                                                                                                                                                                                                                                                                                                                        |
| Secondary Subject Heading:      | Research methods, Evidence based practice, Rehabilitation medicine                                                                                                                                                                                                                                                                                                                                      |
| Keywords:                       | Epidemiologic Research Design, Low Back Pain, Physical Therapy Modalities                                                                                                                                                                                                                                                                                                                               |
|                                 |                                                                                                                                                                                                                                                                                                                                                                                                         |

SCHOLARONE™  
Manuscripts

1  
2  
3 1 THE INFLUENCE OF ALLOCATION CONCEALMENT AND INTENTION-  
4  
5 2 TO-TREAT ANALYSIS ON TREATMENT EFFECTS OF PHYSICAL  
6  
7 3 THERAPY INTERVENTIONS IN LOW BACK PAIN RANDOMIZED  
8  
9 4 CONTROLLED TRIALS: A PROTOCOL OF A META-EPIDEMIOLOGICAL  
10  
11 5 STUDY

14 6 Matheus Oliveira de Almeida<sup>1</sup>, Bruno T Saragiotto<sup>2</sup>, Chris G Maher<sup>2</sup>, Leonardo  
15  
16 7 Oliveira Pena Costa<sup>1</sup>

18 8 <sup>1</sup>Masters and Doctoral Programs in Physical Therapy, Universidade Cidade de São  
19  
20 9 Paulo

22 10 <sup>2</sup>Sydney School of Public Health, Sydney Medical School, The University of Sydney

27 12 \***Author for correspondence:** Matheus Oliveira de Almeida

29 13 Universidade Cidade de São Paulo. Rua Cesário Galeno, 448/475, Tatuapé, São Paulo,  
30  
31 14 SP, Brazil, 05508-900. E-mail: [mathewsalmeyda@hotmail.com](mailto:mathewsalmeyda@hotmail.com)

36 16 **FUNDING STATEMENT**

38 17 Matheus Almeida is supported by São Paulo Research Foundation (FAPESP) -  
39  
40 18 grant #2016/10317-0. The funder had no role in the design of the study and will not be  
41  
42 19 involved in the interpretation or publication of the results.

45 20 **AUTHORS' CONTRIBUTIONS**

47 21 MOA, BTS, CM and LOPC conceived and designed the study. All authors  
48  
49 22 reviewed the final protocol and agreed to its final approval before submission.

52 23 **COMPETING INTEREST**

54 24 None

1  
2  
3 26 **ABSTRACT**

4 27 **Introduction:** Meta-epidemiological studies examining the influence of methodological  
5  
6 28 characteristics, such as allocation concealment and intention-to-treat analysis have been  
7  
8  
9 29 performed in a large number of health-care areas. However, there are no studies  
10  
11 30 investigating these characteristics in physical therapy interventions for patients with low  
12  
13 31 back pain. The aim of this study is to investigate the influence of allocation concealment  
14  
15 32 and the use of intention-to-treat analysis on estimates of treatment effects of physical  
16  
17 33 therapy interventions in low back pain clinical trials.

18  
19  
20 34 **Methods and analysis:** Searches on PubMed, Embase, Cochrane Database of  
21  
22 35 Systematic Reviews, PEDro and CINAHL databases will be performed. We will search  
23  
24 36 for systematic reviews that include a meta-analysis of randomized controlled trials that  
25  
26 37 compared physical therapy interventions in patients with low back pain with placebo or  
27  
28 38 no intervention, and have pain intensity or disability as the primary outcomes.  
29  
30 39 Information about selection (allocation concealment) and attrition bias (intention-to-  
31  
32 40 treat analysis) will be extracted from the PEDro Database for each included trial.  
33  
34 41 Information about bibliographic data, study characteristics, participants' characteristics  
35  
36 42 and study results will be extracted. A random effects model will be used to provide  
37  
38 43 separate estimates of treatment effects for trials with and without allocation  
39  
40 44 concealment and with and without intention to treat analysis (e.g., four estimates). A  
41  
42 45 meta-regression will be performed to measure the association between methodological  
43  
44 46 features and treatment effects from each trial. The dependent variable will be the  
45  
46 47 treatment effect (the mean between-group differences) for the primary outcomes (pain  
47  
48 48 or disability), while the independent variables will be the methodological features of  
49  
50 49 interest (allocation concealment and intention-to-treat analysis). Other covariates will  
51  
52 50 include sample size and sequence generation.  
53  
54  
55  
56  
57  
58  
59  
60

1  
2  
3 51 **Ethics and dissemination:** No ethical approval will be required for this study. The  
4  
5 52 study findings will be published in a peer-reviewed journal and presented at  
6  
7 53 international conferences.

8  
9 54 **Registration number:** PROSPERO (CRD42016052347).

10  
11 55 **Keywords:** Epidemiologic Research Design; Low Back Pain; Physical Therapy  
12  
13 56 Modalities

14  
15  
16  
17 58  
18  
19 59 **Strengths and limitations of this study**

- 20  
21 60 • This protocol was specified following the Preferred Reporting Items for  
22  
23 61 Systematic review and Meta-Analyses Protocols (PRISMA - P) guidelines.  
24  
25 62 • This study will be the first to evaluate the association between methodological  
26  
27 63 characteristics and estimates of the treatment effects of physical therapy  
28  
29 64 interventions in low back pain trials.  
30  
31 65 • The results from this meta-epidemiological study are likely to bring new insights  
32  
33 66 to the physical therapy scientific community by informing issues that need to be  
34  
35 67 considered in randomized trials.  
36  
37 68 • The findings from this meta-epidemiological study may have limited  
38  
39 69 generalizability to other clinical conditions, since it is restricted to physical  
40  
41 70 therapy treatment of low back pain.  
42  
43 71  
44  
45 72  
46  
47 73  
48  
49 74  
50  
51 75  
52  
53 76  
54  
55 77  
56  
57  
58  
59  
60

## 78 INTRODUCTION

79 Systematic reviews and meta-analyses of randomized controlled trials are  
80 considered the ‘gold standard’ to evaluate the efficacy and effectiveness of healthcare  
81 interventions.<sup>1,2</sup> While systematic reviews and meta-analyses provide the best available  
82 evidence to support clinical decision-making and to promote changes in health policies,  
83 they are not free of bias.<sup>3,4</sup> The presence of potential biases in clinical trials, due to  
84 inadequate allocation concealment (selection bias) or lack of intention-to-treat analysis  
85 (attrition bias) may lead to inflated estimates of treatment effect.<sup>5-8</sup> These types of bias  
86 can directly influence the results from meta-analyses, leading to inaccurate conclusions,  
87 misleading clinicians and researchers.<sup>9</sup>

88 Meta-epidemiological studies are designed to understand the impact of study  
89 level characteristics (e.g., methodological quality, study design) in randomized  
90 controlled trials (RCTs), investigating the association between these specific study  
91 characteristics and the intervention effect estimates from collections of meta-  
92 analyses.<sup>10,11</sup> Previous meta-epidemiological studies have evaluated the influence of  
93 methodological characteristics, such as allocation concealment and intention-to-treat  
94 (ITT) analysis on the treatment effects of clinical interventions in different healthcare  
95 areas.<sup>6,12-14</sup> The result of a combined analysis of meta-epidemiological studies  
96 demonstrated that trials with inadequate or unclear allocation concealment  
97 overestimated the treatment effects up to 7%.<sup>15</sup> This means that the conclusions of meta-  
98 analyses are likely to change if restricted to trials with adequate allocation concealment.  
99 It has been reported that 69% of meta-analyses were no longer statistically significant  
100 when trials with unclear or inadequate allocation concealment were excluded.<sup>16</sup>

101 Deviation from ITT analysis is common in systematic reviews and RCTs. A  
102 study of 222 systematic reviews reported that 36% included at least one trial that

1  
2  
3 103 deviated from ITT.<sup>17</sup> However, the influence of performing ITT analysis on the effect  
4  
5 104 estimates of RCTs is still unclear.<sup>13,14,18</sup> The direction and magnitude of the influence of  
6  
7 105 performing ITT analysis may vary between studies according to different methods and  
8  
9 106 definitions used. For example, Dossing et al<sup>19</sup> classified trials as ITT analysis or  
10  
11 107 ‘modified ITT’ analysis. They classified trials as using an ITT analysis if all  
12  
13 108 randomized patients were included in analysis, including both patients with clinical  
14  
15 109 outcome data and patients with imputed outcome data; and ‘modified ITT’ analysis if  
16  
17 110 some individuals were excluded from the analyses despite the authors of the trial  
18  
19 111 referring to it as being ITT. No significant difference in the treatment effect was found  
20  
21 112 between trials that performed ITT analysis compared to ‘modified ITT’ analysis. In  
22  
23 113 contrast, Abraha et al<sup>20</sup>, using a different definition for deviation from ITT analysis  
24  
25 114 without taking into account the occurrence of post-randomization exclusions, found that  
26  
27 115 the treatment effect of trials that performed ‘modified ITT’ analysis was inflated by  
28  
29 116 17% compared to trials that performed ITT analysis.  
30  
31  
32  
33

34 117 Most meta-epidemiological studies derived from reports of RCTs are from the  
35  
36 118 field of medicine. These studies are likely to be different from physical therapy trials,  
37  
38 119 especially regarding the type of intervention and outcomes assessed.<sup>21</sup> To date, there is  
39  
40 120 only one meta-epidemiological study published that evaluated the relationship between  
41  
42 121 methodological characteristics and estimates of treatment effect of physical therapy  
43  
44 122 interventions.<sup>21</sup> This study included different areas of physical therapy and therefore,  
45  
46 123 selecting a wide range of different clinical conditions, leading to a large level of  
47  
48 124 heterogeneity that may hamper the association between the characteristics assessed and  
49  
50 125 treatment effects. Therefore, we chose to focus on low back pain trials. Besides being  
51  
52 126 the most prevalent, costly and disabling musculoskeletal condition, low back pain is the  
53  
54  
55  
56  
57  
58  
59  
60

1  
2  
3 127 musculoskeletal condition with largest number of clinical trials in the physical therapy  
4  
5 128 literature.<sup>22-25</sup>  
6

7  
8 129 The lack of meta-epidemiological studies that have evaluated the association  
9  
10 130 between methodological characteristics and the treatment effects of interventions in low  
11  
12 131 back pain trials motivated us to conduct this study.  
13

14  
15  
16 132

## 133 **OBJECTIVES**

134 The objectives of this study are: (1) to establish if adequate allocation  
135 concealment and the use of ITT analysis influence the estimates of treatment effect of  
136 physical therapy interventions in low back pain RCTs and (2) to evaluate if allocation  
137 concealment and ITT analysis are evaluated and reported adequately in clinical trials.  
138

139

## 139 **METHODS**

### 140 **Study design**

141 This is a protocol of a meta-epidemiological study.

### 142 **Protocol and registration**

143 The protocol was prospectively registered at the International Prospective  
144 Register of Systematic Reviews (PROSPERO), registration number: CRD42016052347.  
145 We followed the Preferred Reporting Items for Systematic review and Meta-Analyses  
146 Protocols (PRISMA - P)<sup>26</sup> guidelines and the checklist is available (see appendix 1).

### 147 **Identification and selection of studies**

148 All RCTs included in systematic reviews with meta-analysis evaluating physical  
149 therapy treatment in adults with non-specific low back pain that included pain or  
150 disability (as continuous variables) as the main outcomes will be included in this study.  
151 Non-specific low back pain is defined as low back pain not attributed to a specific



1  
2  
3 152 pathology, such as nerve root compromise or serious spinal pathology.<sup>27</sup> The physical  
4  
5 153 therapy intervention will be compared with placebo or no intervention. We will consider  
6  
7 154 all possible meta-analyses from the same systematic review, since a systematic review  
8  
9 155 may contain more than one meta-analysis (e.g. different outcomes). Meta-analyses with  
10  
11 156 only one trial will be excluded. Any systematic reviews with meta-analysis with mixed  
12  
13 157 populations will not be considered. Overview of reviews will also not be considered in  
14  
15 158 our study. In the case of Cochrane reviews, if there are multiple versions of the same  
16  
17 159 review (e.g., updates), we will consider only the most recent one.

20  
21 160 Potentially eligible systematic reviews to be included will be retrieved through  
22  
23 161 an electronic search in the following databases from their inception up to February  
24  
25 162 2017: PubMed (<https://www.ncbi.nlm.nih.gov/pubmed>), Embase via OvidSP, Cochrane  
26  
27 163 Database of Systematic Reviews (<http://www.cochranelibrary.com/>), PEDro  
28  
29 164 (<http://pedro.org.au/>) and CINAHL ([https://health.ebsco.com/products/the-cinahl-](https://health.ebsco.com/products/the-cinahl-database)  
30  
31 165 [database](https://health.ebsco.com/products/the-cinahl-database)). There will be no restriction to language of studies. The search strategy will  
32  
33 166 combine validated filters related to ‘systematic reviews and meta-analyses’, ‘physical  
34  
35 167 therapy interventions’ and ‘low back pain’ (See appendix 2 for more details). Two  
36  
37 168 review authors will independently assess and select potential studies to be included  
38  
39 169 based on titles and abstracts. Any discordance will be resolved by consensus, and if  
40  
41 170 necessary, a third assessor will arbitrate the final decision. Full-texts of selected  
42  
43 171 systematic reviews will be collected and evaluated in the same manner. After the  
44  
45 172 process of identification and selection, we will screen the systematic reviews for meta-  
46  
47 173 analyses that fulfill our inclusion criteria. Once we have selected the systematic reviews  
48  
49 174 with the meta-analyses to be included in our study, we will look for the full texts of the  
50  
51 175 RCTs included on these meta-analyses in order to extract their original data. Two  
52  
53 176 authors from our study are trained raters of the PEDro database, so it will be possible to  
54  
55  
56  
57  
58  
59  
60

1  
2  
3 177 obtain the full texts that are indexed on this database. It is important to state that about  
4  
5 178 92% of physical therapy RCTs are indexed on the PEDro database.<sup>28</sup> For those RCTs  
6  
7 179 not indexed on PEDro, we will make all efforts to get these full texts (searching other  
8  
9 180 databases, contact authors).

### 181 **Risk of bias assessment (selection and attrition bias)**

182 We will extract the information about selection (allocation concealment) and  
183 attrition bias (ITT analysis) from the Physiotherapy Evidence Database (PEDro) for all  
184 trials included in the systematic reviews.<sup>29</sup> We decided to use the PEDro scale due to  
185 the following reasons: 1) the PEDro scale has high reliability for individual ratings and  
186 consensus ratings and can be used as a continuous scale for measuring the  
187 methodological quality of trials;<sup>29,30</sup> 2) the PEDro scale is strongly correlated ( $r=0.83$ ;  
188 95% CI 0.76 to 0.88) with the Cochrane Risk of Bias tool;<sup>31</sup> and 3) feasibility: as two  
189 authors from this study are raters from the PEDro database, we can easily download the  
190 PEDro scores for the included RCTs in our study.

191 The definitions used by the PEDro database for these domains are: “*Concealed*  
192 *allocation means that the person who determined if a subject was eligible for inclusion*  
193 *in the trial was unaware, when this decision was made, of which group the subject*  
194 *would be allocated to. A point is awarded for this criteria, even if it is not stated that*  
195 *allocation was concealed, when the report states that allocation was by sealed opaque*  
196 *envelopes or that allocation involved contacting the holder of the allocation schedule*  
197 *who was off-site*”; “*An intention to treat analysis means that, where subjects did not*  
198 *receive treatment (or the control condition) as allocated, and where measures of*  
199 *outcomes were available, the analysis was performed as if subjects received the*  
200 *treatment (or control condition) they were allocated to. This criterion is satisfied, even*  
201 *if there is no mention of analysis by intention to treat, if the report explicitly states that*

1  
2  
3 202 *all subjects received treatment or control conditions as allocated*".<sup>29</sup> Each domain will  
4  
5 203 be rated as 'yes', when the criterion is clearly satisfied, or 'no' when the criterion is not  
6  
7 204 satisfied or the information is unclear in the text. For ITT classification, trials will be  
8  
9 205 rated as 'yes' for ITT analysis, if they use the term 'intention to treat', and it is clear that  
10  
11 206 all subjects received treatment or control conditions as allocated, or that subjects were  
12  
13 207 analyzed according to their initial group allocation. When there are post-randomization  
14  
15 208 exclusions, a trial will be rated as 'no' if the exclusion is on the basis of not receiving  
16  
17 209 allocated treatment. There are some trials that exclude patients after randomization if  
18  
19 210 authors subsequently realize that the participant was not eligible for the trial.<sup>32,33</sup> In  
20  
21 211 this specific case, the trials will be rated as 'yes'. Trials will be rated as 'no', if authors  
22  
23 212 did not mention any intention to treat approach or reported the use of a modified  
24  
25 213 intention to treat approach. However, if it is clear that there were no post-randomization  
26  
27 214 exclusions and all subjects were analyzed according to their initial group allocation, it  
28  
29 215 will be rated as 'yes'.  
30  
31  
32  
33

34 216 When PEDro score is not available at the PEDro database (the article may not be  
35  
36 217 indexed in PEDro database; or the article may be in process to be rated), two assessors,  
37  
38 218 not involved in the study, will independently assess it, using the PEDro rating protocol.  
39  
40 219 Any disagreements will be resolved by discussion or arbitration by a third assessor  
41  
42 220 when consensus cannot be reached. The assessors will be trained raters of the PEDro  
43  
44 221 scale that work in our department and will be blinded to the scope of the manuscript.  
45  
46

#### 47 222 **Data extraction and synthesis**

48  
49 223 Two review authors will independently extract data from all trials included in  
50  
51 224 the selected systematic reviews using a standardized extraction form. Any  
52  
53 225 disagreements will also be resolved by discussion or arbitration by a third reviewer  
54  
55 226 when consensus cannot be reached.  
56  
57  
58  
59  
60

1  
2  
3 227 We will extract bibliographic data (authors, title and year of publication), study  
4  
5 228 characteristics (sample size and interventions used), characteristics of the participants  
6  
7 229 (gender, age, duration and severity of the condition), outcomes results (mean and  
8  
9  
10 230 standard deviation). We will only extract outcomes results for the short-term follow-up  
11  
12 231 (closest to 4 weeks). E-mail requests will be sent to trial authors for additional  
13  
14 232 information data, when necessary.

### 16 233 **Data analysis and synthesis**

18 234 In order to determine whether allocation concealment and ITT analysis affect  
19  
20 235 estimates of treatment effect, a two-level analysis will be conducted. Individual trial  
21  
22 236 data will be retrieved from the meta-analyses included in our study. Initially, the  
23  
24 237 treatment effects of each trial will be calculated using mean differences (MD) with 95%  
25  
26 238 confidence intervals for between-group differences at short-term follow-up, or for  
27  
28 239 between-group differences in change scores.<sup>34,35</sup> Data will be converted to a common 0  
29  
30 240 to 100-point scale if trials had evaluated the same outcome on different scales. Data will  
31  
32 241 be presented separately for each outcome of interest (pain and disability).

34 242 After establishing the treatment effects for the trials included, we will calculate  
35  
36 243 four pooled treatment effect estimates using a random effects model: (i) trials with  
37  
38 244 allocation concealment, (ii) trials without allocation concealment, (iii) trials with ITT  
39  
40 245 analysis and (iv) trials without ITT analysis. This will be done separately for pain and  
41  
42 246 disability outcomes (e.g., a total of eight estimates).

44 247 We will assess between-trial heterogeneity using I-squared test ( $I^2$ ). This test  
45  
46 248 demonstrates whether the percentage of total variation across studies is explained by  
47  
48 249 heterogeneity rather than chance. An  $I^2$  higher than 75% will be considered as 'high  
49  
50 250 heterogeneity', an  $I^2$  of 50% to 75% will be considered as 'moderate heterogeneity', and  
51  
52 251 an  $I^2$  lower than 25% will be considered as 'low heterogeneity'.<sup>36</sup> Review Manager  
53  
54  
55  
56  
57  
58  
59  
60

1  
2  
3 252 (RevMan) version 5 software will be used for all meta-analyses and heterogeneity  
4  
5 253 assessment.

6  
7 254 The second stage of the analysis will be a meta-regression to evaluate the  
8  
9 255 association between methodological characteristics of included trials and the estimates  
10  
11 256 of treatment effect.<sup>11</sup> The dependent variable will be the treatment effects (mean  
12  
13 257 between-group difference) for the main outcomes (pain or disability), while the  
14  
15 258 independent variables will be the methodological characteristics of interest (allocation  
16  
17 259 concealment and ITT analysis). Additionally, we will add two independent covariates in  
18  
19 260 meta-regression analysis: sample size and sequence generation. We decided to  
20  
21 261 investigate the effect of sequence generation and sample size since these variables have  
22  
23 262 been associated with treatment effect estimates.<sup>37</sup> We will extract the information about  
24  
25 263 sequence generation from the PEDro database and is defined as adequate if “subjects  
26  
27 264 were randomly allocated to groups” (e.g., computer-generated random numbers; coin-  
28  
29 265 tossing and dice-rolling).<sup>29</sup> It will be rated as ‘yes’, when the criterion is clearly  
30  
31 266 satisfied, or ‘no’ when the criterion is not satisfied or the information is unclear in the  
32  
33 267 text. The sample size will be considered as a continuous quantitative variable in the  
34  
35 268 meta-regression model. The covariates will be used according to the number of studies  
36  
37 269 included (e.g. one covariate for every ten trials). Random-effects meta-regression will  
38  
39 270 be conducted using the ‘metareg’ command in STATA 10 and weighted using effect  
40  
41 271 size standard errors.<sup>11</sup>

42  
43  
44  
45  
46  
47 272

## 48 49 273 **DISCUSSION**

50  
51 274 To our knowledge, this will be the first study aimed to investigate if the  
52  
53 275 magnitude of the treatment effects of physical therapy interventions in low back pain  
54  
55 276 RCTs is influenced by methodological characteristics (e.g., allocation concealment and  
56  
57  
58  
59  
60

1  
2  
3 277 ITT analysis). Meta-analyses from RCTs are responsible for the most reliable evidence  
4  
5 278 on the treatment of patients with low-back pain, and their results are of interest to a  
6  
7 279 range of stakeholders.  
8

9  
10 280 However, biased results from RCTs can lead to inadequate clinical decision-  
11  
12 281 making and consequently affect patient outcomes. Clinicians may select interventions  
13  
14 282 for their patients based on trials results that are inflated, and so these are not a very  
15  
16 283 reliable guide to treatment selection. For example, a systematic review about the  
17  
18 284 effectiveness of low level laser therapy for chronic LBP found a significantly greater  
19  
20 285 reduction in pain in response to laser therapy compared to placebo.<sup>38</sup> However, this  
21  
22 286 finding was based on a meta-analysis with three clinical trials that did not conceal  
23  
24 287 allocation or use an ITT analysis, so this result could be an overestimate of the true  
25  
26 288 effect of laser. If this premise of overestimated effect is true, clinicians might in good  
27  
28 289 faith select interventions that are unlikely to help their patients.  
29  
30

31  
32 290 Therefore, we believe that the findings of this meta-epidemiological study will  
33  
34 291 provide important contributions to clinicians, researchers, and policy-makers in the low-  
35  
36 292 back pain field. This study will improve the available evidence for physical therapists,  
37  
38 293 through the disclosure of reliable and unbiased results on clinical decision-making.  
39

40  
41 294 The present meta-epidemiological study has several strengths. Since this  
42  
43 295 approach is similar to a systematic review, we will pre-specify methods to identify and  
44  
45 296 select studies to be included through pre-defined inclusion criteria and sensitive search  
46  
47 297 strategy. Data extraction and analysis will be also performed by rigorous methods to  
48  
49 298 avoid potential bias in this study.  
50

51  
52 299 The limitation of the present study is that it is restricted to meta-analyses of  
53  
54 300 physical therapy interventions in non-specific low back pain. Thus, our results may  
55  
56  
57  
58  
59  
60

1  
2  
3 301 have limited generalizability to other interventions as well as to other clinical  
4  
5 302 conditions.

6  
7 303 **Dissemination**

8  
9 304 We intend to disseminate our results through presentations at national and  
10  
11 305 international conferences (e.g., World Confederation for Physical Therapy and  
12  
13 306 International Back and Neck Pain Forum) as well as publishing our study in a high-  
14  
15 307 impact international scientific journal.  
16  
17  
18  
19

20  
21 309 **COMPETING INTEREST**

22  
23 310 None  
24  
25  
26  
27

28 312 **REFERENCES**

- 29 313 1. Cook DJ, Mulrow CD, Haynes RB. Systematic reviews: synthesis of best evidence  
30 314 for clinical decisions. *Ann Intern Med* 1997;126(5):376-80.  
31  
32 315 2. Egger M, Smith GD. Meta-Analysis. Potentials and promise. *BMJ*  
33 316 1997;315(7119):1371-4.  
34  
35 317 3. Hemila H. Re: "Bias in clinical intervention research". *Am J Epidemiol*  
36 318 2007;165(10):1219; author reply -20.  
37  
38 319 4. Juni P, Altman DG, Egger M. Systematic reviews in health care: Assessing the  
39 320 quality of controlled clinical trials. *BMJ* 2001;323(7303):42-6.  
40  
41 321 5. Gluud LL. Bias in clinical intervention research. *Am J Epidemiol* 2006;163(6):493-  
42 322 501.  
43  
44 323 6. Schulz KF, Chalmers I, Hayes RJ, et al. Empirical evidence of bias. Dimensions of  
45 324 methodological quality associated with estimates of treatment effects in controlled  
46  
47 325 trials. *JAMA* 1995;273(5):408-12.  
48  
49  
50  
51  
52  
53  
54  
55  
56  
57  
58  
59  
60

- 1  
2  
3 326 7. Moher D, Pham B, Jones A, et al. Does quality of reports of randomised trials affect  
4  
5 327 estimates of intervention efficacy reported in meta-analyses? *Lancet*  
6  
7 328 1998;352(9128):609-13.  
8  
9  
10 329 8. Kjaergard LL, Villumsen J, Gluud C. Reported methodologic quality and  
11  
12 330 discrepancies between large and small randomized trials in meta-analyses. *Ann Intern*  
13  
14 331 *Med* 2001;135(11):982-9.  
15  
16 332 9. Turner L, Boutron I, Hrobjartsson A, et al. The evolution of assessing bias in  
17  
18 333 Cochrane systematic reviews of interventions: celebrating methodological contributions  
19  
20 334 of the Cochrane Collaboration. *Syst Rev* 2013;2:79.  
21  
22  
23 335 10. Naylor CD. Meta-analysis and the meta-epidemiology of clinical research. *BMJ*  
24  
25 336 1997;315(7109):617-9.  
26  
27 337 11. Sterne JA, Juni P, Schulz KF, et al. Statistical methods for assessing the influence of  
28  
29 338 study characteristics on treatment effects in 'meta-epidemiological' research. *Stat Med*  
30  
31 339 2002;21(11):1513-24.  
32  
33  
34 340 12. Nuesch E, Reichenbach S, Trelle S, et al. The importance of allocation concealment  
35  
36 341 and patient blinding in osteoarthritis trials: a meta-epidemiologic study. *Arthritis Rheum*  
37  
38 342 2009;61(12):1633-41.  
39  
40  
41 343 13. Wood L, Egger M, Gluud LL, et al. Empirical evidence of bias in treatment effect  
42  
43 344 estimates in controlled trials with different interventions and outcomes: meta-  
44  
45 345 epidemiological study. *BMJ* 2008;336(7644):601-5.  
46  
47 346 14. Nuesch E, Trelle S, Reichenbach S, et al. The effects of excluding patients from the  
48  
49 347 analysis in randomised controlled trials: meta-epidemiological study. *BMJ*  
50  
51 348 2009;339:b3244.  
52  
53  
54 349 15. Savovic J, Jones H, Altman D, et al. Influence of reported study design  
55  
56 350 characteristics on intervention effect estimates from randomised controlled trials:  
57  
58  
59  
60



- 1  
2  
3 351 combined analysis of meta-epidemiological studies. *Health Technol Assess*  
4  
5 352 2012;16(35):1-82.  
6  
7 353 16. Pildal J, Hrobjartsson A, Jorgensen KJ, et al. Impact of allocation concealment on  
8  
9 354 conclusions drawn from meta-analyses of randomized trials. *Int J Epidemiol*  
10  
11 355 2007;36(4):847-57.  
12  
13  
14 356 17. Abraha I, Cozzolino F, Orso M, et al. A systematic review found that deviations  
15  
16 357 from intention-to-treat are common in randomized trials and systematic reviews. *J Clin*  
17  
18 358 *Epidemiol* 2017;84:37-46.  
19  
20  
21 359 18. Tierney JF, Stewart LA. Investigating patient exclusion bias in meta-analysis. *Int J*  
22  
23 360 *Epidemiol* 2005;34(1):79-87.  
24  
25 361 19. Dossing A, Tarp S, Furst DE, et al. Modified intention-to-treat analysis did not bias  
26  
27 362 trial results. *J Clin Epidemiol* 2016;72:66-74.  
28  
29  
30 363 20. Abraha I, Cherubini A, Cozzolino F, et al. Deviation from intention to treat analysis  
31  
32 364 in randomised trials and treatment effect estimates: meta-epidemiological study. *BMJ*  
33  
34 365 2015;350:h2445.  
35  
36 366 21. Armijo-Olivo S, Saltaji H, da Costa BR, et al. What is the influence of  
37  
38 367 randomisation sequence generation and allocation concealment on treatment effects of  
39  
40 368 physical therapy trials? A meta-epidemiological study. *BMJ Open* 2015;5(9):e008562.  
41  
42  
43 369 22. Murray CJ, Vos T, Lozano R, et al. Disability-adjusted life years (DALYs) for 291  
44  
45 370 diseases and injuries in 21 regions, 1990-2010: a systematic analysis for the Global  
46  
47 371 Burden of Disease Study 2010. *Lancet* 2012;380(9859):2197-223.  
48  
49  
50 372 23. Vos T, Flaxman AD, Naghavi M, et al. Years lived with disability (YLDs) for 1160  
51  
52 373 sequelae of 289 diseases and injuries 1990-2010: a systematic analysis for the Global  
53  
54 374 Burden of Disease Study 2010. *Lancet* 2012;380(9859):2163-96.  
55  
56  
57  
58  
59  
60

- 1  
2  
3 375 24. Buchbinder R, Blyth FM, March LM, et al. Placing the global burden of low back  
4  
5 376 pain in context. *Best Pract Res Clin Rheumatol* 2013;27(5):575-89.  
6  
7 377 25. Beattie PF, Silfies SP, Jordon M. The evolving role of physical therapists in the  
8  
9 378 long-term management of chronic low back pain: longitudinal care using assisted self-  
10  
11 379 management strategies. *Braz J Phys Ther* 2016;20(6):580-91.  
12  
13 380 26. Shamseer L, Moher D, Clarke M, et al. Preferred reporting items for systematic  
14  
15 381 review and meta-analysis protocols (PRISMA-P) 2015: elaboration and explanation.  
16  
17 382 *BMJ* 2015;349:g7647.  
18  
19 383 27. van Tulder M, Becker A, Bekkering T, et al. Chapter 3. European guidelines for the  
20  
21 384 management of acute nonspecific low back pain in primary care. *Eur Spine J* 2006;15  
22  
23 385 Suppl 2:S169-91.  
24  
25 386 28. Michaleff ZA, Costa LO, Moseley AM, et al. CENTRAL, PEDro, PubMed, and  
26  
27 387 EMBASE are the most comprehensive databases indexing randomized controlled trials  
28  
29 388 of physical therapy interventions. *Phys Ther* 2011;91(2):190-7.  
30  
31 389 29. Maher CG, Sherrington C, Herbert RD, et al. Reliability of the PEDro scale for  
32  
33 390 rating quality of randomized controlled trials. *Phys Ther* 2003;83(8):713-21.  
34  
35 391 30. Shiwa SR, Costa LO, Costa LM, et al. Reproducibility of the Portuguese version of  
36  
37 392 the PEDro Scale. *Cad Saude Publica* 2011;27(10):2063-68.  
38  
39 393 31. Yamato TP, Maher C, Koes B, et al. The PEDro scale had acceptably high  
40  
41 394 convergent validity, construct validity, and interrater reliability in evaluating  
42  
43 395 methodological quality of pharmaceutical trials. *J Clin Epidemiol* 2017.  
44  
45 396 32. Garcia AN, Costa L, Hancock MJ, et al. McKenzie Method of Mechanical  
46  
47 397 Diagnosis and Therapy was slightly more effective than placebo for pain, but not for  
48  
49 398 disability, in patients with chronic non-specific low back pain: a randomised placebo  
50  
51 399 controlled trial with short and longer term follow-up. *Br J Sports Med* 2017.  
52  
53  
54  
55  
56  
57  
58  
59  
60

- 1  
2  
3 400 33. Hancock MJ, Maher CG, Latimer J, et al. Assessment of diclofenac or spinal  
4  
5 401 manipulative therapy, or both, in addition to recommended first-line treatment for acute  
6  
7 402 low back pain: a randomised controlled trial. *Lancet* 2007;370(9599):1638-43.  
8  
9 403 34. Higgins JPT, Green S. Cochrane Handbook for Systematic Reviews of Interventions  
10  
11 404 Version 5.1.0 (updated March 2011)2011.  
12  
13  
14 405 35. Herbert RD. How to estimate treatment effects from reports of clinical trials. I:  
15  
16 406 Continuous outcomes. *Aust J Physiother* 2000;46(3):229-35.  
17  
18 407 36. Higgins JP, Thompson SG, Deeks JJ, et al. Measuring inconsistency in meta-  
19  
20 408 analyses. *BMJ* 2003;327(7414):557-60.  
21  
22  
23 409 37. Dechartres A, Trinquart L, Faber T, et al. Empirical evaluation of which trial  
24  
25 410 characteristics are associated with treatment effect estimates. *J Clin Epidemiol*  
26  
27 411 2016;77:24-37.  
28  
29 412 38. Huang Z, Ma J, Chen J, et al. The effectiveness of low-level laser therapy for  
30  
31 413 nonspecific chronic low back pain: a systematic review and meta-analysis. *Arthritis Res*  
32  
33 414 *Ther* 2015;17:360.

415

416

## APPENDIX 1 – PRISMA-P 2015 Checklist

This checklist has been adapted for use with protocol submissions to *Systematic Reviews* from Table 3 in Moher D et al: Preferred reporting items for systematic review and meta-analysis protocols (PRISMA-P) 2015 statement. *Systematic Reviews* 2015 4:1

| Section/topic                     | #  | Checklist item                                                                                                                                                                                  | Information reported     |                          | Line number(s) |
|-----------------------------------|----|-------------------------------------------------------------------------------------------------------------------------------------------------------------------------------------------------|--------------------------|--------------------------|----------------|
|                                   |    |                                                                                                                                                                                                 | Yes                      | No                       |                |
| <b>ADMINISTRATIVE INFORMATION</b> |    |                                                                                                                                                                                                 |                          |                          |                |
| <b>Title</b>                      |    |                                                                                                                                                                                                 |                          |                          |                |
| Identification                    | 1a | Identify the report as a protocol of a systematic review                                                                                                                                        | X                        | <input type="checkbox"/> | 1-5            |
| Update                            | 1b | If the protocol is for an update of a previous systematic review, identify as such                                                                                                              | <input type="checkbox"/> | X                        | n/a            |
| <b>Registration</b>               | 2  | If registered, provide the name of the registry (e.g., PROSPERO) and registration number in the Abstract                                                                                        | X                        | <input type="checkbox"/> | 54             |
| <b>Authors</b>                    |    |                                                                                                                                                                                                 |                          |                          |                |
| Contact                           | 3a | Provide name, institutional affiliation, and e-mail address of all protocol authors; provide physical mailing address of corresponding author                                                   | X                        | <input type="checkbox"/> | 6-14           |
| Contributions                     | 3b | Describe contributions of protocol authors and identify the guarantor of the review                                                                                                             | X                        | <input type="checkbox"/> | 20-22          |
| <b>Amendments</b>                 | 4  | If the protocol represents an amendment of a previously completed or published protocol, identify as such and list changes; otherwise, state plan for documenting important protocol amendments | <input type="checkbox"/> | X                        | n/a            |
| <b>Support</b>                    |    |                                                                                                                                                                                                 |                          |                          |                |
| Sources                           | 5a | Indicate sources of financial or other support for the review                                                                                                                                   | X                        | <input type="checkbox"/> | 16-19          |
| Sponsor                           | 5b | Provide name for the review funder and/or sponsor                                                                                                                                               | X                        | <input type="checkbox"/> | 16-19          |
| Role of sponsor/funder            | 5c | Describe roles of funder(s), sponsor(s), and/or institution(s), if any, in developing the protocol                                                                                              | X                        | <input type="checkbox"/> | 16-19          |
| <b>INTRODUCTION</b>               |    |                                                                                                                                                                                                 |                          |                          |                |
| <b>Rationale</b>                  | 6  | Describe the rationale for the review in the context of what is already known                                                                                                                   | X                        | <input type="checkbox"/> | 79-131         |
| <b>Objectives</b>                 | 7  | Provide an explicit statement of the question(s) the review will address with reference to participants, interventions, comparators, and outcomes (PICO)                                        | X                        | <input type="checkbox"/> | 133-137        |

| Section/topic                      | #   | Checklist item                                                                                                                                                                                                                              | Information reported     |                          | Line number(s) |
|------------------------------------|-----|---------------------------------------------------------------------------------------------------------------------------------------------------------------------------------------------------------------------------------------------|--------------------------|--------------------------|----------------|
|                                    |     |                                                                                                                                                                                                                                             | Yes                      | No                       |                |
| <b>METHODS</b>                     |     |                                                                                                                                                                                                                                             |                          |                          |                |
| Eligibility criteria               | 8   | Specify the study characteristics (e.g., PICO, study design, setting, time frame) and report characteristics (e.g., years considered, language, publication status) to be used as criteria for eligibility for the review                   | X                        | <input type="checkbox"/> | 147-159        |
| Information sources                | 9   | Describe all intended information sources (e.g., electronic databases, contact with study authors, trial registers, or other grey literature sources) with planned dates of coverage                                                        | X                        | <input type="checkbox"/> | 160-167        |
| Search strategy                    | 10  | Present draft of search strategy to be used for at least one electronic database, including planned limits, such that it could be repeated                                                                                                  | X                        | <input type="checkbox"/> | Appendix 2     |
| <b>STUDY RECORDS</b>               |     |                                                                                                                                                                                                                                             |                          |                          |                |
| Data management                    | 11a | Describe the mechanism(s) that will be used to manage records and data throughout the review                                                                                                                                                | X                        | <input type="checkbox"/> | 171-174        |
| Selection process                  | 11b | State the process that will be used for selecting studies (e.g., two independent reviewers) through each phase of the review (i.e., screening, eligibility, and inclusion in meta-analysis)                                                 | X                        | <input type="checkbox"/> | 167-171        |
| Data collection process            | 11c | Describe planned method of extracting data from reports (e.g., piloting forms, done independently, in duplicate), any processes for obtaining and confirming data from investigators                                                        | X                        | <input type="checkbox"/> | 223-226        |
| Data items                         | 12  | List and define all variables for which data will be sought (e.g., PICO items, funding sources), any pre-planned data assumptions and simplifications                                                                                       | X                        | <input type="checkbox"/> | 227-232        |
| Outcomes and prioritization        | 13  | List and define all outcomes for which data will be sought, including prioritization of main and additional outcomes, with rationale                                                                                                        | X                        | <input type="checkbox"/> | 149-150        |
| Risk of bias in individual studies | 14  | Describe anticipated methods for assessing risk of bias of individual studies, including whether this will be done at the outcome or study level, or both; state how this information will be used in data synthesis                        | X                        | <input type="checkbox"/> | 181-221        |
| <b>DATA</b>                        |     |                                                                                                                                                                                                                                             |                          |                          |                |
| Synthesis                          | 15a | Describe criteria under which study data will be quantitatively synthesized                                                                                                                                                                 | X                        | <input type="checkbox"/> | 234-246        |
|                                    | 15b | If data are appropriate for quantitative synthesis, describe planned summary measures, methods of handling data, and methods of combining data from studies, including any planned exploration of consistency (e.g., $I^2$ , Kendall's tau) | X                        | <input type="checkbox"/> | 247-251        |
|                                    | 15c | Describe any proposed additional analyses (e.g., sensitivity or subgroup analyses, meta-regression)                                                                                                                                         | X                        | <input type="checkbox"/> | 254-271        |
|                                    | 15d | If quantitative synthesis is not appropriate, describe the type of summary planned                                                                                                                                                          | <input type="checkbox"/> | X                        | n/a            |
| Meta-bias(es)                      | 16  | Specify any planned assessment of meta-bias(es) (e.g., publication bias across studies, selective                                                                                                                                           | <input type="checkbox"/> | X                        | n/a            |

| Section/topic                            | #  | Checklist item                                                                   | Information reported     |          | Line number(s) |
|------------------------------------------|----|----------------------------------------------------------------------------------|--------------------------|----------|----------------|
|                                          |    |                                                                                  | Yes                      | No       |                |
|                                          |    | reporting within studies)                                                        |                          |          |                |
| <b>Confidence in cumulative evidence</b> | 17 | Describe how the strength of the body of evidence will be assessed (e.g., GRADE) | <input type="checkbox"/> | <b>X</b> | n/a            |

For peer review only

**APPENDIX 2 – Search strategy for each database****Pubmed**

1 dorsalgia.ti,ab,kw.

2 exp Back Pain/

3 “backache” ti,ab

4 (lumbar adj pain) ti,ab

5 coccyx.ti,ab

6 coccydynia.ti,ab

7 sciatica.ti,ab

8 exp sciatic neuropathy/

9 “spondylosis” ti,ab

10 “lumbago” ti,ab

11 lumbago.ti,ab,kw.

12 (disc adj degeneration) ti,ab

13 (disc adj prolapse) ti,ab

14 (disc adj herniation) ti,ab

15 OR / #1-14

16 systematic review /

17 meta-analysis /

18 (#16 OR #17)

19 (#15 AND #19)

**Embase**

1 dorsalgia.ti,ab,kw.

2 (back pain or backache or back ache).ti,ab,kw.

- 1  
2  
3 3 exp LOW BACK PAIN/  
4  
5 4 exp BACKACHE/  
6  
7  
8 5 (lumb\$ adj3 pain).ti,ab,kw.  
9  
10 6 coccyx.ti,ab,kw.  
11  
12 7 coccydynia.ti,ab,kw.  
13  
14  
15 8 sciatica.ti,ab,kw.  
16  
17 9 sciatica/  
18  
19 10 exp ISCHIALGIA/  
20  
21 11 spondylosis.mp.  
22  
23 12 lumbago.ti,ab,kw.  
24  
25 13 back disorder\$.ti,ab,kw.  
26  
27 14 or/1-13  
28  
29 15 systematic review /  
30  
31 16 meta-analysis /  
32  
33 17 (#15 OR #16)  
34  
35 18 (#14 AND #17)  
36  
37  
38  
39  
40  
41  
42  
43

#### 44 **Cochrane Database of Systematic Reviews**

45  
46 #1 MeSH descriptor: [Back Pain] explode all trees  
47

48 #2 dorsalgia  
49

50 #3 backache or back ache  
51

52 #4 MeSH descriptor: [Back Pain] explode all trees  
53

54 #5 lumb\* near pain or coccyx or coccydynia or sciatica or spondylosis  
55

56 #6 MeSH descriptor: [Spine] explode all trees  
57

58 #7 MeSH descriptor: [Spinal Diseases] explode all trees  
59  
60



- 1
- 2
- 3 #8 lumbago or discitis or disc near herniat\*
- 4
- 5 #9 spinal fusion
- 6
- 7
- 8 #10 facet near joint\*
- 9
- 10 #11 MeSH descriptor: [Intervertebral Disk] explode all trees
- 11
- 12 #12 postlaminectomy
- 13
- 14 #13 arachnoiditis
- 15
- 16
- 17 #14 failed near back
- 18
- 19 #15 MeSH descriptor: [Cauda Equina] explode all trees
- 20
- 21
- 22 #16 lumb\* near vertebra\*
- 23
- 24 #17 spinal near stenosis
- 25
- 26
- 27 #18 slipped near (disc\* or disk\*)
- 28
- 29 #19 degenerat\* near (disc\* or disk\*)
- 30
- 31 #20 stenosis near (spine or root or spinal)
- 32
- 33 #21 displace\* near (disc\* or disk\*)
- 34
- 35 #22 prolap\* near (disc\* or disk\*)
- 36
- 37
- 38 #23 MeSH descriptor: [Sciatic Neuropathy] explode all trees
- 39
- 40 #24 sciatic\*
- 41
- 42 #25 back disorder\*
- 43
- 44 #26 back near pain
- 45
- 46 #27 (#1 or #2 or #3 or #4 or #5 or #6 or #7 or #8 or #9 or #10 or #11 or #12 or #13 or
- 47 #14 or #15 or #16 or #17 or #18 or #19 or #20 or #21 or #22 or #23 or #24 or #25 or
- 48 #26)
- 49
- 50 #28 systematic review
- 51
- 52 #29 meta-analysis
- 53
- 54 #30 (#28 or #29)
- 55
- 56 #31 (#27 AND #30)
- 57
- 58
- 59
- 60

**PEDro**

Problem: Pain

AND

Body Part: lumbar spine, sacro-iliac joint or pelvis

AND

Method: systematic review

**CINAHL**

S1 "lumbago"

S2 (MH "Spondylolisthesis") OR (MH "Spondylolysis")

S3 (MH "Thoracic Vertebrae")

S4 S1 or S2 or S3

S5 lumbar N2 vertebra

S6 (MH "Lumbar Vertebrae")

S7 "coccydynia"

S8 "coccyx"

S9 "sciatica"

S10 (MH "Sciatica")

S11 (MH "Coccyx")

S12 S5 or S6 or S7 or S8 or S9 or S10 or S11

S13 backache or "back ache"

S14 lumb\* W3 pain

S15 back pain

S16 (MH "Low Back Pain")

S17 (MH "Back Pain+")

1  
2  
3  
4  
5  
6  
7  
8  
9  
10  
11  
12  
13  
14  
15  
16  
17  
18  
19  
20  
21  
22  
23  
24  
25  
26  
27  
28  
29  
30  
31  
32  
33  
34  
35  
36  
37  
38  
39  
40  
41  
42  
43  
44  
45  
46  
47  
48  
49  
50  
51  
52  
53  
54  
55  
56  
57  
58  
59  
60

S18 "dorsalgia"

S19 S13 S14 or S15 or S16 or S17 or S18 or S34

S20 S4 or S12 or S19

S21 systematic review

S22 meta-analysis

S23 S21 or S22

S24 S20 and S23

For peer review only

## PRISMA-P 2015 Checklist

This checklist has been adapted for use with protocol submissions to *Systematic Reviews* from Table 3 in Moher D et al: Preferred reporting items for systematic review and meta-analysis protocols (PRISMA-P) 2015 statement. *Systematic Reviews* 2015 **4**:1

| Section/topic                     | #  | Checklist item                                                                                                                                                                                  | Information reported     |                          | Line number(s) |
|-----------------------------------|----|-------------------------------------------------------------------------------------------------------------------------------------------------------------------------------------------------|--------------------------|--------------------------|----------------|
|                                   |    |                                                                                                                                                                                                 | Yes                      | No                       |                |
| <b>ADMINISTRATIVE INFORMATION</b> |    |                                                                                                                                                                                                 |                          |                          |                |
| <b>Title</b>                      |    |                                                                                                                                                                                                 |                          |                          |                |
| Identification                    | 1a | Identify the report as a protocol of a systematic review                                                                                                                                        | X                        | <input type="checkbox"/> | 1-5            |
| Update                            | 1b | If the protocol is for an update of a previous systematic review, identify as such                                                                                                              | <input type="checkbox"/> | X                        | n/a            |
| <b>Registration</b>               | 2  | If registered, provide the name of the registry (e.g., PROSPERO) and registration number in the Abstract                                                                                        | X                        | <input type="checkbox"/> | 54             |
| <b>Authors</b>                    |    |                                                                                                                                                                                                 |                          |                          |                |
| Contact                           | 3a | Provide name, institutional affiliation, and e-mail address of all protocol authors; provide physical mailing address of corresponding author                                                   | X                        | <input type="checkbox"/> | 6-14           |
| Contributions                     | 3b | Describe contributions of protocol authors and identify the guarantor of the review                                                                                                             | X                        | <input type="checkbox"/> | 20-22          |
| <b>Amendments</b>                 | 4  | If the protocol represents an amendment of a previously completed or published protocol, identify as such and list changes; otherwise, state plan for documenting important protocol amendments | <input type="checkbox"/> | X                        | n/a            |
| <b>Support</b>                    |    |                                                                                                                                                                                                 |                          |                          |                |
| Sources                           | 5a | Indicate sources of financial or other support for the review                                                                                                                                   | X                        | <input type="checkbox"/> | 16-19          |
| Sponsor                           | 5b | Provide name for the review funder and/or sponsor                                                                                                                                               | X                        | <input type="checkbox"/> | 16-19          |
| Role of sponsor/funder            | 5c | Describe roles of funder(s), sponsor(s), and/or institution(s), if any, in developing the protocol                                                                                              | X                        | <input type="checkbox"/> | 16-19          |
| <b>INTRODUCTION</b>               |    |                                                                                                                                                                                                 |                          |                          |                |
| <b>Rationale</b>                  | 6  | Describe the rationale for the review in the context of what is already known                                                                                                                   | X                        | <input type="checkbox"/> | 79-131         |
| <b>Objectives</b>                 | 7  | Provide an explicit statement of the question(s) the review will address with reference to participants, interventions, comparators, and outcomes (PICO)                                        | X                        | <input type="checkbox"/> | 133-137        |

| Section/topic                      | #   | Checklist item                                                                                                                                                                                                                              | Information reported     |                          | Line number(s) |
|------------------------------------|-----|---------------------------------------------------------------------------------------------------------------------------------------------------------------------------------------------------------------------------------------------|--------------------------|--------------------------|----------------|
|                                    |     |                                                                                                                                                                                                                                             | Yes                      | No                       |                |
| <b>METHODS</b>                     |     |                                                                                                                                                                                                                                             |                          |                          |                |
| Eligibility criteria               | 8   | Specify the study characteristics (e.g., PICO, study design, setting, time frame) and report characteristics (e.g., years considered, language, publication status) to be used as criteria for eligibility for the review                   | X                        | <input type="checkbox"/> | 147-159        |
| Information sources                | 9   | Describe all intended information sources (e.g., electronic databases, contact with study authors, trial registers, or other grey literature sources) with planned dates of coverage                                                        | X                        | <input type="checkbox"/> | 160-167        |
| Search strategy                    | 10  | Present draft of search strategy to be used for at least one electronic database, including planned limits, such that it could be repeated                                                                                                  | X                        | <input type="checkbox"/> | Appendix 2     |
| <b>STUDY RECORDS</b>               |     |                                                                                                                                                                                                                                             |                          |                          |                |
| Data management                    | 11a | Describe the mechanism(s) that will be used to manage records and data throughout the review                                                                                                                                                | X                        | <input type="checkbox"/> | 171-174        |
| Selection process                  | 11b | State the process that will be used for selecting studies (e.g., two independent reviewers) through each phase of the review (i.e., screening, eligibility, and inclusion in meta-analysis)                                                 | X                        | <input type="checkbox"/> | 167-171        |
| Data collection process            | 11c | Describe planned method of extracting data from reports (e.g., piloting forms, done independently, in duplicate), any processes for obtaining and confirming data from investigators                                                        | X                        | <input type="checkbox"/> | 223-226        |
| Data items                         | 12  | List and define all variables for which data will be sought (e.g., PICO items, funding sources), any pre-planned data assumptions and simplifications                                                                                       | X                        | <input type="checkbox"/> | 227-232        |
| Outcomes and prioritization        | 13  | List and define all outcomes for which data will be sought, including prioritization of main and additional outcomes, with rationale                                                                                                        | X                        | <input type="checkbox"/> | 149-150        |
| Risk of bias in individual studies | 14  | Describe anticipated methods for assessing risk of bias of individual studies, including whether this will be done at the outcome or study level, or both; state how this information will be used in data synthesis                        | X                        | <input type="checkbox"/> | 181-221        |
| <b>DATA</b>                        |     |                                                                                                                                                                                                                                             |                          |                          |                |
| Synthesis                          | 15a | Describe criteria under which study data will be quantitatively synthesized                                                                                                                                                                 | X                        | <input type="checkbox"/> | 234-246        |
|                                    | 15b | If data are appropriate for quantitative synthesis, describe planned summary measures, methods of handling data, and methods of combining data from studies, including any planned exploration of consistency (e.g., $I^2$ , Kendall's tau) | X                        | <input type="checkbox"/> | 247-251        |
|                                    | 15c | Describe any proposed additional analyses (e.g., sensitivity or subgroup analyses, meta-regression)                                                                                                                                         | X                        | <input type="checkbox"/> | 254-271        |
|                                    | 15d | If quantitative synthesis is not appropriate, describe the type of summary planned                                                                                                                                                          | <input type="checkbox"/> | X                        | n/a            |
| Meta-bias(es)                      | 16  | Specify any planned assessment of meta-bias(es) (e.g., publication bias across studies, selective                                                                                                                                           | <input type="checkbox"/> | X                        | n/a            |

| Section/topic                            | #  | Checklist item                                                                   | Information reported     |          | Line number(s) |
|------------------------------------------|----|----------------------------------------------------------------------------------|--------------------------|----------|----------------|
|                                          |    |                                                                                  | Yes                      | No       |                |
|                                          |    | reporting within studies)                                                        |                          |          |                |
| <b>Confidence in cumulative evidence</b> | 17 | Describe how the strength of the body of evidence will be assessed (e.g., GRADE) | <input type="checkbox"/> | <b>X</b> | n/a            |

For peer review only
