# Supplementary material for: Influence of allocation concealment and intention-to-treat analysis on treatment effects of physical therapy interventions in low back pain randomised controlled trials: a protocol of a meta-epidemiological study
Source: PubMed Central journal article supplement — BMJ Open. 2017 Sep 27;7(9):e017301. doi: 10.1136/bmjopen-2017-017301 (PMC5623523; doi:10.1136/bmjopen-2017-017301), 2017-09-27
Supplement: bmjopen-2017-017301supp002.pdf [file bmjopen-2017-017301supp002.pdf]

## **APPENDIX 2 – Search strategy for each database**

### **Pubmed**

- 1 dorsalgia.ti,ab,kw.
- 2 exp Back Pain/
- 3 “backache” ti,ab
- 4 (lumbar adj pain) ti,ab
- 5 coccyx.ti,ab
- 6 coccydynia.ti,ab
- 7 sciatica.ti,ab
- 8 exp sciatic neuropathy/
- 9 “spondylosis” ti,ab
- 10 “lumbago” ti,ab
- 11 lumbago.ti,ab,kw.
- 12 (disc adj degeneration) ti,ab
- 13 (disc adj prolapse) ti,ab
- 14 (disc adj herniation) ti,ab
- 15 OR / #1-14
- 16 systematic review /
- 17 meta-analysis /
- 18 (#16 OR #17)
- 19 (#15 AND #19)

### **Embase**

- 1 dorsalgia.ti,ab,kw.
- 2 (back pain or backache or back ache).ti,ab,kw.

- 3 exp LOW BACK PAIN/
- 4 exp BACKACHE/
- 5 (lumb\$ adj3 pain).ti,ab,kw.
- 6 coccyx.ti,ab,kw.
- 7 coccydynia.ti,ab,kw.
- 8 sciatica.ti,ab,kw.
- 9 sciatica/
- 10 exp ISCHIALGIA/
- 11 spondylosis.mp.
- 12 lumbago.ti,ab,kw.
- 13 back disorder\$.ti,ab,kw.
- 14 or/1-13
- 15 systematic review /
- 16 meta-analysis /
- 17 (#15 OR #16)
- 18 (#14 AND #17)

### **Cochrane Database of Systematic Reviews**

#1 MeSH descriptor: [Back Pain] explode all trees

#2 dorsalgia

#3 backache or back ache

#4 MeSH descriptor: [Back Pain] explode all trees

#5 lumb\* near pain or coccyx or coccydynia or sciatica or spondylosis

#6 MeSH descriptor: [Spine] explode all trees

#7 MeSH descriptor: [Spinal Diseases] explode all trees

- #8 lumbago or discitis or disc near herniat\*
- #9 spinal fusion
- #10 facet near joint\*
- #11 MeSH descriptor: [Intervertebral Disk] explode all trees
- #12 postlaminectomy
- #13 arachnoiditis
- #14 failed near back
- #15 MeSH descriptor: [Cauda Equina] explode all trees
- #16 lumb\* near vertebra\*
- #17 spinal near stenosis
- #18 slipped near (disc\* or disk\*)
- #19 degenerat\* near (disc\* or disk\*)
- #20 stenosis near (spine or root or spinal)
- #21 displace\* near (disc\* or disk\*)
- #22 prolap\* near (disc\* or disk\*)
- #23 MeSH descriptor: [Sciatic Neuropathy] explode all trees
- #24 sciatic\*
- #25 back disorder\*
- #26 back near pain
- #27 (#1 or #2 or #3 or #4 or #5 or #6 or #7 or #8 or #9 or #10 or #11 or #12 or #13 or #14 or #15 or #16 or #17 or #18 or #19 or #20 or #21 or #22 or #23 or #24 or #25 or #26)
- #28 systematic review
- #29 meta-analysis
- #30 (#28 or #29)
- #31 (#27 AND #30)

## **PEDro**

Problem: Pain

AND

Body Part: lumbar spine, sacro-iliac joint or pelvis

AND

Method: systematic review

## **CINAHL**

S1 "lumbago"

S2 (MH "Spondylolisthesis") OR (MH "Spondylolysis")

S3 (MH "Thoracic Vertebrae")

S4 S1 or S2 or S3

S5 lumbar N2 vertebra

S6 (MH "Lumbar Vertebrae")

S7 "coccydynia"

S8 "coccyx"

S9 "sciatica"

S10 (MH "Sciatica")

S11 (MH "Coccyx")

S12 S5 or S6 or S7 or S8 or S9 or S10 or S11

S13 backache or "back ache"

S14 lumb\* W3 pain

S15 back pain

S16 (MH "Low Back Pain")

S17 (MH "Back Pain+")

S18 "dorsalgia"

S19 S13 S14 or S15 or S16 or S17 or S18 or S34

S20 S4 or S12 or S19

S21 systematic review

S22 meta-analysis

S23 S21 or S22

S24 S20 and S23
